## Bone Morphogenetic Protein-9 Controls Pulmonary Vascular Growth and Remodeling

**Running title:** *Berrebeh et al.; Role of BMP-9 in pulmonary vascular remodeling*

Nihel Berrebeh (PharmD, PhD)<sup>1,2</sup>, Yvon Mbouamboua (PhD)<sup>3</sup>, Raphaël Thuillet (BSc)<sup>1,2</sup>,  
Mina Ottaviani (BSc)<sup>1,2</sup>, Mustapha Kamel Chelgham (MSc)<sup>1,2</sup>, Virginie Magnone (PhD)<sup>3</sup>, Agnès Desroches-  
Castan (PhD)<sup>4</sup>, Nicolas Ricard (PhD)<sup>4</sup>, Ignacio Anegon (MD)<sup>5</sup>, Séverine Remy (PhD)<sup>5</sup>, Ralph Theo Schermuly  
(PhD)<sup>6</sup>, Kevin Lebrigand (PhD)<sup>3</sup>, Baktybek Kojonazarov (PhD)<sup>6</sup>, Laurent Savale (MD, PhD)<sup>1,2,7</sup>,  
Marc Humbert (MD, PhD)<sup>1,2,7</sup>, Sabine Bailly (PhD)<sup>4</sup>, Pascal Barbry (PhD)<sup>3</sup>,  
Ly Tu (PhD)<sup>1,2,\*</sup>, Christophe Guignabert (PhD)<sup>1,2,\*</sup>

1. INSERM UMR\_S 999 « Pulmonary Hypertension: Pathophysiology and Novel Therapies », Hôpital Marie Lannelongue, 92350 Le Plessis-Robinson, France.
2. Université Paris-Saclay, Faculté de Médecine, Pulmonary Hypertension: Pathophysiology and Novel Therapies, 94276 Le Kremlin-Bicêtre, France.
3. Université Côte d'Azur and CNRS, Institut de Pharmacologie Moléculaire et Cellulaire, F06560 Sophia Antipolis, France.
4. Biosanté unit U1292, Grenoble Alpes University, INSERM, CEA, F-38000 Grenoble, France.
5. Center for Research in Transplantation and Translational Immunology, Plateforme Transgénèse Rat & Immuno Phénomique, INSERM 1064 & SFR François Bonamy, CNRS UMS3556, F44098 Nantes, France.
6. Department of Internal Medicine, Member of the German Center of Lung Research (DZL), Justus-Liebig-University of Giessen (JLU), Aulweg 130, Giessen, 35392, Germany.
7. Assistance Publique - Hôpitaux de Paris (AP-HP), Service de Pneumologie et Soins Intensifs Respiratoires, Hôpital Bicêtre, 94270 Le Kremlin-Bicêtre, France.

\* These authors contributed equally to this work

### **Corresponding author:**

Christophe Guignabert, Ph.D (ORCID ID: 0000-0002-8545-4452)  
Université Paris Saclay - INSERM  
UMR\_S 999: "Pulmonary Hypertension: Pathophysiology and Novel Therapies"  
Faculté de Médecine Paris-Saclay - Bâtiment de recherche (2e étage)  
63 Rue Gabriel Péri  
94276 Le Kremlin Bicêtre, FRANCE  
Tel: +33 1 40948833 - E-mail: [christophe.guignabert@inserm.fr](mailto:christophe.guignabert@inserm.fr)

**Manuscript word count:** 5,222

**Journal Subject Codes:** Pulmonary circulation and disease:[18]

**NOTE:** This preprint reports new research that has not been certified by peer review and should not be used to guide clinical practice.

## Abstract

**Background**—Pulmonary arterial hypertension (PAH), a life-limiting condition characterized by dysfunction of pulmonary microvascular endothelium, is predisposed by mutations in several genes that are critical for the proper activation of specific bone morphogenetic protein (BMP) receptor complexes that phosphorylate intracellular Smad1/5/8 in endothelial cells. However, the functional importance of BMP-9 (*GDF2*), one of the high affinity ligands for ALK1 (*ACVRL1*) and BMPR-II (*BMPR2*), for the pulmonary microvasculature remains imperfectly understood.

**Objective**—The aim of this study was first to determine the *in vivo* impact of BMP-9 deficiency on pulmonary vascular growth and remodeling, then to assess whether ALK1 expression can alter BMP-9 transcriptional signatures in human pulmonary microvascular endothelial cells (PMECs).

**Methods**—CRISPR-Cas9 gene editing was used to create *Gdf2* knockout rats in *Sprague Dawley* background. Computed micro-tomography (Micro-Ct) scan after Microfil perfusion was performed to generate high-resolution 3D-images of the pulmonary arterial tree. The influence of ALK1 abundance on the transcriptional signatures of BMP-9 responses in human PMECs was assessed by single cell (sc)-RNAseq. Functional studies were performed using human PMECs exposed to BMP-9, the ALK1/2 inhibitor ML347, and ALK1-Fc fusion protein that neutralizes BMP9/10 and two animal models of severe pulmonary hypertension (PH).

**Results**—Micro-Ct angiography revealed structural and functional remodeling along the pulmonary vascular tree in BMP-9 deficient rats, resulting in vasodilation and increase in vascular density. scRNA-seq experiments identified distinct transcriptional signatures in human PMECs in response to BMP-9 responses. ALK1 expression had a direct impact on both proangiogenic capacities and transcriptional responses of PMECs to BMP-9. Functional studies performed in human PMECs confirmed that abundance of BMP-9 and ALK1 acted as modulators of PMEC tube formation, migration and proliferation, and also of vascular endothelial growth factor (VEGF)/VEGFR activities. The structural and functional remodeling observed in *Gdf2* knockout rats coincided with a lower susceptibility to develop severe PH induced by monocrotaline (MCT) and SU5416+hypoxia (SuHx).

**Conclusion**—BMP-9 and ALK1 are critical modulators of pulmonary vascular growth and remodeling. Our results provide potential mechanisms explaining why BMP-9 deficient animals are less susceptible to the rise in pulmonary vascular resistance in experimental models of PH.

**Key words:** pulmonary hypertension; pulmonary vascular remodeling; pulmonary vasodilation; angiogenesis; VEGF

## Non-standard Abbreviations and Acronym:

$\alpha$ -smooth muscle actin:  **$\alpha$ -SMA**; activin receptor-like kinase-1: **ALK1**; adrenomedullin: **ADM**; arbitrary unit: **AU**; protein kinase B: **AKT**; arteriovenous malformations: **AVMs**; bone morphogenetic protein: **BMP**; bone morphogenetic protein receptor type-II: **BMPR-II**; 5-bromo-2'-deoxyuridine: **BrdU**; BMP response element: **BRE**; cluster: **C**; CRISPR-associated protein 9: **Cas9**; C-C motif chemokine ligand 2: **CCL2**; clusters of differentiation: **CD**; chronic hypoxia : **CHx**; clustered regularly interspaced short palindromic repeats: **CRISPR**; control: **CTR**; 4',6-diamidino-2-phenylindole: **DAPI**; differentially expressed genes: **DEGs**; hereditary haemorrhagic telangiectasia: **HHT**; endothelial cell: **EC**; endothelin-1: **ET-1**; extracellular matrix: **ECM**; extracellular signal-regulated kinase 1/2: **ERK 1/2**, fetal calf serum, **FCS**; gene ontology/biological process: **GO/BP**; gene set enrichment analysis: **GSEA**; interleukin: **IL**; internal diameter: **ID**; knockout: **KO**; left ventricle: **LV**; low-density lipoprotein: **LDL**; lumen: **L**; messenger ribonucleic acid: **mRNA**; micro-computed tomography: **micro-CT**; monocrotaline: **MCT**; mean pulmonary artery pressure: **mPAP**; placental growth factor: **PGF**; pulmonary arterial hypertension: **PAH**; pulmonary artery-smooth muscle cell: **PA-SMC**; phosphatidylinositol 3-kinase: **PI3K**; pulmonary microvascular endothelial cell: **PMEC**; pulmonary vascular resistance: **PVR**; right ventricle: **RV**; single-cell RNA sequencing: **scRNA-seq**; sodium dodecyl-sulfate polyacrylamide gel electrophoresis: **SDS-PAGE**, sugen (SU5416)+chronic hypoxia: **SuHx**; vascular endothelial growth factor: **VEGF**; transforming growth factor-beta: **TGF $\beta$** ; von Willebrand factor: **vWF**.

## Clinical Perspective

### What Is New?

- *Gdf2* knockout (KO) rats exhibit increased pulmonary vascular density and vasodilation compared to wild-type littermates.
- In experimental models of pulmonary hypertension (PH), *Gdf2* KO rats are less susceptible to the rise of pulmonary vascular resistance.
- BMP-9 has varying effects on different populations of human microvascular endothelial cells (PMECs), depending on the abundance of BMP receptors. Specifically, PMECs with higher levels of ALK1 exhibit a pro-angiogenic profile that is attenuated after BMP-9 stimulation.
- Our study demonstrated a complex interplay between BMP-9, ALK1, and vascular endothelial growth factor (VEGF)/VEGFR activities in PMECs.

### What Are the Clinical Implications?

- BMP-9 deficiency alone may not be sufficient to induce spontaneous PH, underscoring the complex, multifactorial nature of the disease and highlighting the potential involvement of multiple hits, such as genetic and environmental factors. This underscores the need for a more comprehensive approach to understanding and treating PAH, including the use of molecules that target the interconnected BMP/TGF $\beta$  and VEGF/VEGR pathways.

## 1 **Introduction**

2 Pulmonary arterial hypertension (PAH) is a severe cardiopulmonary vascular condition that can lead to right heart failure  
3 and death if left untreated. It is characterized by an increase in mean pulmonary arterial pressure (mPAP) at rest along  
4 with elevated pulmonary vascular resistance (PVR), resulting from marked pulmonary vascular remodeling <sup>1,2</sup>. This  
5 process involves narrowing and obliteration of pulmonary arterioles, accumulation of endothelial (ECs) and smooth  
6 muscle cells (PA-SMCs), and rarefaction of peripheral arterioles, leading to right ventricular (RV) pressure overload,  
7 dilatation, and failure. Despite current PAH-specific therapies, the 3-year survival rate remains at approximately 70% <sup>3</sup>,  
8 highlighting the need for better treatments based on a deeper understanding of the disease pathophysiology.

9 Recent genetic studies have highlighted the crucial role of the loss of bone morphogenetic protein receptor type II  
10 (BMPR-II) signaling in the pathophysiology of human pulmonary arterial hypertension (PAH). In fact, loss-of-function  
11 mutations in genes encoding proteins that mediate BMPR-II signaling, such as *BMPR2*, *ACVRL1* (ALK1), *BMP10*, *ENG*  
12 (endoglin), *GDF2* (BMP-9), *CAVI* (caveolin-1), and *SMAD9* (Smad8), have been identified in heritable and sporadic  
13 cases of PAH <sup>4</sup>. However, mutations in *ACVRL1*, *ENG*, or *SMAD4*, and occasionally in *GDF2*, are also associated with  
14 hereditary hemorrhagic telangiectasia (HHT), a congenital vascular patterning syndrome characterized by arteriovenous  
15 malformations (AVMs), mucocutaneous telangiectasia, and nosebleeds. Despite sharing common mutations affecting  
16 ligands, receptors, or signaling molecules of the BMPR-II pathway, HHT and PAH exhibit distinct phenotypes,  
17 penetrance, age of onset, and clinical management. To date, the underlying reasons for this dichotomy between these two  
18 conditions remain unclear.

19 The main objective of this study was to investigate the functional impact of BMP-9 deficiency, a high-affinity ligand  
20 for ALK1 and BMPR-II, on pulmonary vascular growth and remodeling *in vivo*, and to determine the significance of  
21 ALK1 abundance on the EC surface for the transcriptional response to BMP9 stimulation in human pulmonary  
22 microvascular endothelial cells (PMECs).

## 24 **Material and Methods**

### 25 ***Generation of Gdf2 knockout (KO) rats***

26 *Gdf2*<sup>-/-</sup> rats were generated using CRISPR-Cas9 technology by microinjection of a sgRNA complexed with Cas9 protein  
27 into *Sprague Dawley* rat zygotes <sup>5</sup>. The targeted sequence for the sgRNA was on exon 2 (supplementary figure 1).  
28 Cleavage of the DNA generated a frameshift of the coding sequence with the generation of a premature stop codon  
29 defined by microfluidic capillary electrophoresis and Sanger DNA sequencing <sup>6</sup>.

30 BRE (BMP Responsive element) dual luciferase activity assay was used to validate the deficiency in BMP-9 in cell lines.  
31 To this aim, NIH-3T3 cells were transfected with a mixture of the reporter plasmid pGL3(BRE)2-luc encoding firefly  
32 luciferase downstream of a BMP response element, pRL-TK luc encoding Renilla luciferase and a plasmid encoding  
33 human ALK1, as previously described<sup>7</sup>. Rat sera (1% final) were added in serum free medium and luciferase  
34 measurements were performed 18 hours later.

35

### 36 *Assessment of pulmonary vascular changes*

37 **Contrast echocardiogram:** Contrast-enhanced transthoracic echocardiography was blindly performed using  
38 microbubbles as ultrasound contrast agents generated by agitating a mixture of 9 mL Gelofusine<sup>®</sup> solution (B, Braun) and  
39 1 mL air between two 10 mL syringes connected by a 3-way stopcock. Once the microbubbles were prepared, 2 mL were  
40 injected as a bolus into the jugular vein that had previously been cannulated with a fluid-filled polyethylene catheter for  
41 intravenous administration of agents. After a peripheral bolus injection, the passage of microbubbles through the right  
42 and left heart was visualized from a four-chamber apical view. To quantify the transit of microbubbles, we initially  
43 assessed the signal strength in decibels (dB) in the right ventricle before and during injection to ensure the uniformity of  
44 the administered microbubbles. Additionally, we measured the signal strength in dB in the left ventricle prior to injection  
45 and five heartbeats after the introduction of contrast microbubbles. We report the differences ( $\Delta$ ) observed in each  
46 ventricle before and after microbubble administration.

47 **Microvessel perfusion:** Fluorescent 8  $\mu$ m microspheres (Phosphorex, Hopkinton, MA) were injected into the main  
48 pulmonary artery of anesthetized rats (isoflurane) to investigate right to left shunting (pulmonary arteriovenous shunts) as  
49 previously described<sup>8</sup>. Then, we collected kidneys and brain from the injected rats and examined the trapped beads using  
50 Zeiss Axiovert A1 microscope (Zeiss, Paris, France). One kidney of each rat was minced, sonicated, and digested with  
51 proteinase K (0.2mg/mL) for 1 hour before the quantification of fluorescent microbeads using flow cytometry  
52 MACSQuant Analyser (Miltenyi Biotec, Paris, France).

53 **Micro-computed tomography (micro-CT) imaging of the pulmonary artery tree:** Rats were randomized, deeply  
54 anesthetized with isoflurane and heparinized. The pulmonary artery was cannulated through the RV with a 21-gauge  
55 indwelling intravenous catheter filled with saline and the left atrium incised. To ensure maximum vessel dilation, the  
56 lungs were then perfused with 2 mL of sodium nitroprusside ( $10^{-4}$  M). The trachea was cannulated with PE-10 tubing and  
57 inflated to 20 cm H<sub>2</sub>O with 4% formaldehyde. Then, Microfil (Flowtech Inc, Carver, MA) was infused at 0.02 mL/min  
58 (8:1:1, solution of polymer: diluent: curing agent). After perfusion and solidification of the contrast medium, the trachea  
59 was ligated to maintain airway distension, and lungs were then removed *en bloc* and fixed in paraformaldehyde for 24

60 hours. An *ex vivo* imaging of the left lung was then performed by micro-CT system (Quantum GX, PerkinElmer, USA,  
61 Rigaku, Japan). Scan and analyses were performed blindly.

62 ***Invasive right heart catheterization and echocardiographic assessment of left ventricular function:*** Rats were  
63 randomized and either studied in room air at 8-14 weeks of age, or after induction of mild PH upon exposure to chronic  
64 hypoxia (CHx). To validate our observations in models of severe PH, two different but complementary models were  
65 used: the monocrotaline (MCT) and sugen+hypoxia (SuHx) models. Briefly, *Gdf2*<sup>-/-</sup> and *Gdf2*<sup>+/+</sup> rats were studied 3  
66 weeks after a single subcutaneous injection of MCT (60 mg/kg; Sigma-Aldrich) or received a single subcutaneous  
67 injection of SU5416 (20 mg/kg) and were exposed to normobaric hypoxia for 3 weeks before returning to room air for 5  
68 weeks. At the end of these protocols, pulsed-wave doppler during transthoracic echocardiography was used to evaluate  
69 the severity of PH by assessing pulmonary artery acceleration time (AT) to ejection time (ET) ratio and evaluate right  
70 ventricular function by assessment of the tricuspid annular plane systolic excursion (TAPSE) using Vivid E9 (GE  
71 Healthcare, Velizy-Villacoublay, France). In addition, mPAP were measured blindly by closed chest right heart  
72 catheterization, as previously described. A polyvinyl catheter was introduced into the right jugular vein and pushed  
73 through the RV into the pulmonary artery. In parallel, a carotid artery was cannulated for the measurement of systemic  
74 arterial pressure. Cardiac output (CO) in rats was measured using the thermodilution method. Hemodynamic values were  
75 automatically calculated by the physiological data acquisition system (LabChart 7 Software; ADInstruments Co.,  
76 Shanghai, China). After measurement of hemodynamic parameters, the thorax was opened and the left lung immediately  
77 removed and frozen. The right lung was fixed in the distended state with formalin buffer. As previously described, the  
78 RV hypertrophy was assessed by the Fulton index [weight ratio of RV and (LV + septum)] and the percentage of wall  
79 thickness [ $(2 \times \text{medial wall thickness} / \text{external diameter}) \times 100$ ] and of muscularized vessels were determined<sup>9</sup>.

80

81 ***Isolation, culture, and functional analysis of primary human pulmonary microvascular endothelial cells (PMECs)***

82 Human PMECs were isolated and cultured as previously described<sup>10,11</sup>. Cells were routinely tested for mycoplasma and  
83 used at early passages < 5. To suppress BMP-9–ALK1–Smad1,5,8 signaling in human PMECs, studies were performed  
84 in the presence of human recombinant ALK1-Fc (R&D Systems), a ligand trap for BMP-9 and BMP-10, or with the  
85 ALK1 inhibitor ML347 (Tocris) at the concentrations indicated in the legends. Serum free medium or IgG1 in 5% FCS  
86 medium were used as controls.

87 ***siRNA transfection:*** To suppress ALK1 expression, human PMECs were transfected using lipofectamine RNAiMAX  
88 with 100 nM of ALK1 siRNA or with a scrambled sequence (Invitrogen, Cergy-Pontoise, France). The cells were studied  
89 within 3 days after transfection. Suppression of ALK1 levels was documented 72 hours after transfection.

90 **Cell proliferation:** EC proliferation was measured by 5-bromo-2'-deoxyuridine (BrdU) incorporation using the Delfia  
91 Cell proliferation kit (PerkinElmer, Courtaboeuf, France) and a time-resolved fluorometer EnVision Multilabel Reader  
92 (PerkinElmer) as previously described<sup>12</sup>. Human PMECs were grown to 60% to 70% confluence at 37°C and  
93 synchronized for 24h in serum free medium, then exposed to recombinant BMP-9 (10ng/mL) (R&D Systems) in  
94 presence of 5% FCS for 24 hours.

95 **Cell migration:** EC migration was assessed using the *in vitro* wound-healing assay with the Ibidi Culture-Insert (Ibidi,  
96 Germany). Human PMECs were incubated with complete medium for 24h then after insert removal with or without  
97 BMP-9 10ng/mL in presence of 5% FCS.

98 **Tube formation assay:** Confluent monolayers of human PMECs were stained using Celltracker™ Green CFMDA  
99 (Invitrogen) for 30 min then exposed to 10 ng/mL of recombinant BMP-9 for 24h. Angiogenesis  $\mu$ -slide (Ibidi, Germany)  
100 were coated with gel matrix (ECM from Engelbreth-Holm-Swarm murine sarcoma Sigma-Aldrich) 10 $\mu$ L/well. After 30  
101 min polymerization at 37°C, suspension of cells (1 $\times$ 10<sup>4</sup>) pretreated with BMP-9 was added in a volume of 50  $\mu$ L/well of  
102 medium with or without BMP-9. The cultures were left at 37°C for 4 hours and tube formation confirmed by fluorescent  
103 microscopy. Images were collected and parameters measured and quantified using Image J software.

104

#### 105 **10 X Single cell RNA Sequencing**

106 **Cell treatment:** Human PMECs from 5 explanted donor lungs were isolated, cultured (passage 3-4) and synchronized for  
107 24 hours by serum starvation (0.3% FCS) and stimulated with 10 ng/ml BMP-9 for 4 hours, resulting in a total of 5  
108 experimental conditions. Cell suspensions with viabilities between 96 and 98% were used for these experiments.

109 **Sequencing:** Single-cell profiling was performed with 10X Genomics Chromium kit RNA 3' V3.1, according to the  
110 vendor specifications. Single-cell capture was performed according to a design of 5 experimental groups, each composed  
111 of one sample culture treated or not by BMP-9 from the same donor. Each condition in each experimental group was  
112 labelled with a distinct barcoded antibody, using the cell-hashing protocol developed by 10X Genomics. The five  
113 resulting single-cell libraries were sequenced as a paired-end run (R1:28bp x R2: 55bp) on an Illumina NextSeq500.

114 **Single-cell data processing:** 10x Genomics libraries Fastq files were analyzed using Cell Ranger (v3.0.2) against hg38  
115 genome. Hashtag oligonucleotides (HTOs) were counted using CITE-seq-Count v1.4.2<sup>13</sup>. Statistical analysis was  
116 performed using Seurat v4.0<sup>14</sup>. For each of the 5-sequencing run, cells from BMP9 stimulated and non-stimulated were  
117 demultiplexed based on their HTO enrichment using HTODemux Seurat function<sup>15</sup> resulting in a total of 10 different  
118 samples (5 samples stimulated with BMP-9 and 5 samples non-stimulated with BMP-9). We first analysed each sample  
119 individually. Briefly, cells with less than 200 detected genes or more than 15% mitochondrial reads were removed. We



120 normalized the data using SCTransform method ([https://satijalab.org/seurat/articles/sctransform\\_vignette.html](https://satijalab.org/seurat/articles/sctransform_vignette.html)) and  
121 performed a dimensionality reduction by Principal Component Analysis (PCA) on the 3.000 highly variable features. Data  
122 were then visualized using Uniform Manifold Approximation and Projection (UMAP) embedding. Louvain algorithm<sup>15</sup>  
123 and nearest neighbor graph, based on the first 30 principal components, was used to cluster the cells using a resolution of  
124 0.3. For integration, we used reciprocal PCA method. Briefly, we separately integrated 5 samples stimulated with BMP-9  
125 and 5 samples not stimulated with BMP-9. Next, we used the merge seurat function<sup>14</sup> to group the two integrated datasets  
126 so that BMP-9 treated cells would not mix with untreated BMP-9 cells. We defined 4 clusters according to ACVRL1  
127 (ALK1) expression: ALK1 high, ALK1 high + BMP-9, ALK1 low and ALK1 low + BMP-9. Identification of gene markers  
128 was done using FindAllMarkers Seurat function<sup>14</sup>. Differential analysis between clusters were carried out with  
129 FindMarkers Seurat function<sup>14</sup>. Functional analysis and Gene Set Enrichment Analysis was then done using gene markers  
130 using ClusterProfiler package and gseGO function<sup>16</sup>.

### 131

### 132 ***Total RNA Isolation and Real-Time Quantitative Polymerase Chain Reaction***

133 The mRNA expression of *ACVRL1* were measured by real-time quantitative PCR as previously described <sup>11</sup>.

134

### 135 ***Western immunoblot and Immunostaining***

136 Cells/tissues were homogenized and sonicated in RIPA buffer containing protease and phosphatase inhibitors (Sigma-  
137 Aldrich). Protein extract (30 µg) was used to detect ALK1, VEGFR1, VEGFR2, p-VEGFR2, p-SRC, p-AKT, AKT,  
138 GAPDH and β-actin (**Table S1**) by SDS-PAGE as previously described <sup>11</sup>. For immunohistochemistry and  
139 immunofluorescent staining, paraffin sections were incubated overnight at 4°C with antibodies directed against ALK1,  
140 alpha-smooth muscle actin (α-SMA), von Willebrand factor (vWF), CD31 (**Table S1**) as previously described <sup>11</sup>.

141

### 142 ***Statistical Analyses***

143 All results are presented as mean ± SEM. Statistical calculations were performed with GraphPad Prism 7 (GraphPad  
144 Software, Inc). The unpaired Student t test was used after testing for normality and equal variance (Shapiro-Wilk test) to  
145 compare 2 groups. One-way ANOVA Tukey post hoc test was used to compare multiple groups if the data followed a  
146 normal distribution, otherwise nonparametric Kruskal-Wallis post hoc tests were used. Sample size is indicated in the  
147 figure legends. Results with  $P < 0.05$  were considered statistically significant.

148

### 149 **Ethics statement**

150 Animal experiments were approved by the Ethics Committee of the Université Paris-Saclay and carried out in accordance  
151 with the Guide for the Care and Use of Laboratory Animals adopted by the National Institute of Health and Medical  
152 Research (Inserm) and were registered with ministerial numbers APAFiS #35319. The use of human tissues was  
153 approved by the local ethics committee (CPP EST-III n°18.06.06, Le Kremlin-Bicêtre, France) and all patients gave  
154 informed consent before the study.

155

156

## 157 **Results**

158

### 159 *Assessment of the pulmonary arterial bed in BMP-9 deficient rats*

160 We found that *Gdf2*<sup>-/-</sup> rats were viable and fertile and developed normally with no obvious phenotypic abnormality. To  
161 visualize and determine whether BMP-9 deficiency is associated with defects in the pulmonary arterial bed in *Gdf2*<sup>-/-</sup>  
162 KO rats, *Gdf2*<sup>-/-</sup> and *Gdf2*<sup>+/+</sup> rats were terminally perfused with Microfil via the main pulmonary artery and left lung  
163 were subjected to micro-Ct imaging and analysis. The loss of BMP-9 signaling was validated by the loss of BRE activity  
164 (**Figure S1**). We found higher vessel volume and numbers of vascular junctions in *Gdf2*<sup>-/-</sup> rat lungs relative to *Gdf2*<sup>+/+</sup>  
165 rat lungs (**Figure 1A**). These vascular differences were associated with decreased levels of hemoglobin and hematocrit in  
166 *Gdf2*<sup>-/-</sup> relative to *Gdf2*<sup>+/+</sup> rats (**Figure 1B**). To further characterize this vascular phenotype in BMP-9 deficient rats, we  
167 injected a microbubble-based contrast agent in the pulmonary artery to perform ultrasound imaging technique. Figure 1C  
168 shows two-D echocardiography in apical four chamber view demonstrating microbubbles in the right-sided chambers of  
169 the heart in both *Gdf2*<sup>-/-</sup> and *Gdf2*<sup>+/+</sup> rats. However, microbubbles were also observed in the left chamber of the heart in  
170 *Gdf2*<sup>-/-</sup> rats originating from the pulmonary vein 5 heart beats following injection (**Figure 1C**), indicating vasodilation  
171 and/or the existence of arteriovenous shunting in the pulmonary vasculature. We confirmed these observations with the  
172 passage of fluorescent microbeads (8 µm in diameter) from the jugular vein to the systemic vasculature, as reflected by  
173 the higher numbers of microbeads per kidney found in *Gdf2*<sup>-/-</sup> rats relative to *Gdf2*<sup>+/+</sup> rats (**Figure S2**). Consistent with  
174 these vascular differences, higher numbers of small-diameter (internal diameter [ID] < 20 µm) and large-diameter vessels  
175 (20 µm < ID < 200 µm) were found (**Figure 1D**).

176 These data thus reveal that BMP-9 deficiency in rats led to structural and functional remodeling along the pulmonary  
177 vascular tree, resulting in vasodilation and increase in density.

178

### 179 *Determination of the transcriptomic responses of human pulmonary microvascular EC (PMEC) subtypes to BMP-9*

180 To address whether distinct transcriptional signatures of BMP-9 responses are present among the different types of  
181 pulmonary ECs and if a relationship exist with the abundance of type-1, type-2, and type-3 receptors, primary cultures of  
182 human PMECs were generated from lung specimens. The BMP-9 transcriptional responses were analyzed at early  
183 passages (< 4) in 5 healthy donors (n=5) using scRNA-seq. At baseline, these human cells represent 5 distinct PMEC  
184 populations that naturally expressed different patterns of BMP/TGF- $\beta$  receptors that can therefore be used to study how  
185 they specifically respond to exogenous BMP-9 (**Figure 2A**). In the absence of BMP-9, these 5 distinct clusters indeed  
186 expressed different levels of ALK1 (*ACVRL1*), BMPR-II (*BMPR2*), TGF $\beta$ RII (*TGFBR2*), and endoglin (*ENG*).  
187 However, C5 (referred as ALK1<sup>high</sup>) expressed high levels of ALK1 (*ACVRL1*) and BMPR-II (*BMPR2*), which bind with  
188 strong affinity BMP-9, compared to C1-C4 (referred as ALK1<sup>low</sup>) (**Figure 2A**).

189 To better characterize the cellular phenotype in ALK1<sup>high</sup> and ALK1<sup>low</sup> PMEC-clusters, we compared gene ontology  
190 term enrichment between the two clusters using the functional *Gene Ontology/Biological Process* (GO/BP) database. The  
191 ALK1<sup>high</sup> PMEC-cluster was characterized by a strong proangiogenic signature, as reflected by the expression of genes  
192 involved in the activation of critical biological processes and molecular pathways, such as sprouting angiogenesis,  
193 regulation of angiogenesis, cell motility, tube development, and EC proliferation and migration (**Figure 2B and S3A**). A  
194 similar observation was made after a gene set enrichment analysis (GSEA) of differentially expressed genes (DEGs)  
195 between ALK1<sup>high</sup> PMECs *versus* ALK1<sup>low</sup> PMECs showed that also identified sprouting angiogenesis, angiogenesis, EC  
196 proliferation, cell motility and tube development (**Figure 2C**). We found several genes belonging to the VEGF pathway  
197 to be highly expressed in this ALK1<sup>high</sup> PMEC-cluster, such as VEGFR2 (*KDR*), placental growth factor (*PGF*), VEGF  
198 B, VEGF C, and the decoy receptor VEGFR1 (*FLT1*) (**Table S2**). In contrast, the TOP 50 GO terms in ALK1<sup>low</sup> PMEC-  
199 clusters contained terms associated with negative regulation of fibroblast proliferation, fatty acid transport, triglyceride  
200 metabolic process, lipid transport, tissue morphogenesis circulatory system development, suggesting that ALK1<sup>low</sup>  
201 PMECs are most likely involved in vascular stability (**Figure S3B**). Of note, all PMEC-clusters identified displayed  
202 comparable levels of different EC markers, including of CD31 (*PECAMI1*), ETS-related gene (*ERG*), cadherin-5 (*CDH5*),  
203 or Tie2 (*TEK*) (**Figure S4A**) and were negative for mesenchymal markers such as SM22 (*TAGLN*) or  $\alpha$ -smooth muscle  
204 actin (*ACTA2*) (**Figure S4B**).

205 A 4-hour exposure to 10 ng/mL of recombinant BMP-9 markedly altered the transcriptome of each PMEC-clusters  
206 with no change in their respective identity, as revealed by the identification of distinct clusters of cells exposed to BMP-9  
207 (**Figure 3A and S3**). We observed that BMP-9 treatment resulted in a decrease in *ACVRL1* mRNA levels, as well as an  
208 expected increase in the expression of several BMP-9 target genes in both ALK1<sup>low</sup> and ALK1<sup>high</sup> PMECs. Specifically,  
209 we found increased expression of mRNA for *BMPR2*, *ENG*, *IDI1*, *ID2*, *ID3*, *SMAD6*, and *SMAD7* in response to BMP-9

210 treatment (**Figure 3B, S4C and Table S2**). Furthermore, the exposure of ALK1<sup>high</sup> PMEC-cluster to BMP-9 leads to  
211 attenuation of the proangiogenic signature as reflected by the loss of pathways/gene sets related to angiogenesis in the  
212 GO/BP analysis (**Figure 3C**). The GO/BP analysis between ALK1<sup>low</sup> + BMP9 *versus* ALK1<sup>low</sup> revealed that changes in  
213 gene expression induced by BMP-9 in ALK1<sup>low</sup> are associated with regulation of BMP signaling pathway, regulation of  
214 blood pressure, regulation of ossification, endothelium development, or blood vessel development (**Figure 3D**). Of note,  
215 each cluster preserved its endothelial identity and displayed similar mRNA levels of *PECAM1*, *ERG*, *CDH5*, *TEK*,  
216 *SNAIL1*, *SNAIL2*, or *TWIST1* markers, without mesenchymal marker expression (**Figure S4**).

217 The scRNA-seq data obtained in cultured human PMECs indicate the existence of distinct transcriptional signatures  
218 of BMP-9 responses in pulmonary microvascular ECs which are supported, at least in part, by ALK1 abundance that both  
219 affects the EC phenotype and BMP-9 transcriptional responses.

### 220

#### 221 ***Role of ALK1 as a modulator of PMEC tube formation, migration and proliferation***

222 To investigate the role of ALK1 as a modulator of PMEC tube formation, migration, and proliferation, we examined the  
223 effects of decreasing BMP-9 and ALK1 levels using ALK1-Fc and siRNA, respectively, on cultured human PMECs. Our  
224 results showed that the addition of exogenous BMP-9 attenuated cell migration, proliferation, and tube formation,  
225 consistent with previous studies<sup>17</sup> (**Figure S5**). Consistent with these findings, removing BMP-9 from media containing  
226 5% FCS using ALK1-Fc showed the opposite effects on PMECs (**Figure 4A-C**). We also confirmed that decreasing the  
227 abundance of ALK1 in serum enriched media could reduce PMEC migration, proliferation, and tube formation.  
228 Specifically, siRNA-mediated knockdown of ALK1 (**Figure 4D-F and Figure S6**) and inhibition with the potent and  
229 selective ALK2 and ALK1 inhibitor ML 347 (**Figure S5**) both resulted in reduced PMEC migration, proliferation, and  
230 tube formation. These findings indicate that, similar to BMP-9 levels, the abundance of ALK1 plays a significant role in  
231 PMEC tube formation, migration, and proliferation.

### 232

#### 233 ***In vitro and in vivo modulation of VEGF/VEGFR activities by BMP-9 and ALK1***

234 Our scRNA-seq data reveals that PMECs with lower expression of ALK1 (ALK1<sup>low</sup>) have decreased expression of FLT1  
235 and KDR receptors, as well as lower production of PGF, compared to PMECs with high ALK1 expression (ALK1<sup>high</sup>). In  
236 addition, we found that treatment of ALK1<sup>high</sup> PMECs with BMP-9 results in increased expression of VEGF family  
237 ligands, such as VEGF-C and PGF, and strongly induces the expression of the FLT1 receptor (**Figure 5A**). To confirm  
238 the link between BMP-9 and the VEGF signaling pathway, we conducted Western blot analysis to assess the effects of  
239 BMP-9 on ALK1, VEGFR1, and VEGFR2 protein levels. Our results showed that BMP-9 decreases ALK1 protein levels

240 in human PMECs (**Figure 5B**), while simultaneously increasing VEGFR1 (~2-3 fold) and VEGFR2 (~1.5-2 fold)  
241 expression (**Figure 5C**). Furthermore, BMP-9 pretreatment of human PMECs attenuates VEGFR2, Src, and Akt  
242 phosphorylation in human PMECs exposed to VEGF (**Figure 5D**). Our findings are consistent with the observation that  
243 *Gdf2*<sup>-/-</sup> rat lungs display higher ALK1 protein levels and VEGF/VEGFR activities relative to *Gdf2*<sup>+/+</sup> (**Figure 5E and**  
244 **5F**), which suggests that the abundance of ALK1, like BMP-9 levels, is an important modulator of VEGF/VEGFR  
245 activities in PMECs both *in vitro* and *in vivo*.

246

247 **Susceptibility of BMP-9 deficient rats to pulmonary vascular remodeling induced by monocrotaline (MCT) and**  
248 ***sugen*+hypoxia (SuHx)**

249 *Gdf2*<sup>-/-</sup> rats exhibit normal values of mPAP as compared with *Gdf2*<sup>+/+</sup> rats ( $15.3 \pm 0.4$  versus  $15.7 \pm 0.4$  mmHg,  
250 respectively, NS), cardiac output ( $94.5 \pm 1.8$  versus  $100.3 \pm 1.6$  mL/min, respectively, NS), and total pulmonary vascular  
251 resistance ( $161 \pm 5$  versus  $156 \pm 4$  mmHg/mL/min, respectively, NS) (**Figure 6**). Consistent with these findings, no  
252 obvious changes were observed in blood vascular structures in lungs of *Gdf2*<sup>-/-</sup> rats relative to *Gdf2*<sup>+/+</sup> rats (% of wall  
253 thickness:  $23 \pm 1.7$  versus  $23 \pm 1.6$  %, respectively, NS; % of muscularized arteries:  $11.2 \pm 0.9$  versus  $11.9 \pm 0.9$  %,  
254 respectively, NS) (**Figure 7A**). In addition, no difference in cardiomyocyte size ( $146 \pm 36$  versus  $163 \pm 8$   $\mu\text{m}^2$ ,  
255 respectively, NS) and in collagen deposition were noted between *Gdf2*<sup>-/-</sup> and *Gdf2*<sup>+/+</sup> rats using picrosirius staining ( $2.5$   
256  $\pm 0.4$  versus  $1.9 \pm 0.4$  %, respectively, NS) (**Figure 7B**). Consistent with previously published data obtained in BMP-9  
257 deficient mice chronically exposed to hypoxia<sup>18,19</sup>, we also found that *Gdf2*<sup>-/-</sup> rats developed less pronounced  
258 pulmonary vascular remodeling and PH induced by chronic hypoxia than *Gdf2*<sup>+/+</sup> rats (**Figure 6 and 7**).

259 Because the vascular remodeling and PH induced by chronic hypoxia are known to be relatively mild and  
260 reversible, we next evaluated the susceptibility of *Gdf2*<sup>-/-</sup> rats to develop irreversible remodeling of the pulmonary  
261 vessels in two severe models of experimental PH induced by monocrotaline (MCT) and by a single injection of  
262 SU5416 before exposure to hypoxia for 3 weeks (SuHx). No rats died during these studies. Compared with vehicle-  
263 treated *Gdf2*<sup>-/-</sup> and *Gdf2*<sup>+/+</sup> rats in room air, evidence of PH was found in *Gdf2*<sup>-/-</sup> as well as in *Gdf2*<sup>+/+</sup> MCT and SuHx  
264 rats. This was reflected by increases in mPAP, TPVR and RV/(LV+S) ratio, together with a decrease in CO, without  
265 changes of systemic blood pressure. However, this elevation in mPAP and TPVR was less pronounced in *Gdf2*<sup>-/-</sup> MCT  
266 and SuHx rats (**Figure 6**). Consistent with these results, *Gdf2*<sup>-/-</sup> MCT and SuHx rats displayed lower percentages of wall  
267 thickness and of muscularized distal pulmonary arteries relative to *Gdf2*<sup>+/+</sup> MCT and SuHx rats (**Figure 7A**).  
268 Furthermore, *Gdf2*<sup>-/-</sup> MCT and SuHx rats displayed less pronounced increase in the accumulation of collagen (stained  
269 with picroSirius red) in the RV (**Figure 7B**).

270 *Gdf2*<sup>-/-</sup> rats are therefore less susceptible than wild-type rats to the elevation of pulmonary vascular resistance  
271 induced by either CHx, MCT, and SuHx.

272

273

## 274 **Discussion**

275 A significant body of evidence supports the notion that weakening BMP-ALK1-Smad1/5/8 signaling in pulmonary  
276 microvascular endothelial cells (PMECs) contributes to various pathogenic features of pulmonary arterial hypertension  
277 (PAH), such as endothelial dysfunction, vascular smooth muscle cell proliferation, and resistance to apoptosis. Our study  
278 showed that BMP-9 deficiency in rats caused alterations in the 3D architecture of the lung microcirculation, leading to  
279 vasodilation and increased vascular density. We also confirmed that BMP-9 loss in rodents is not sufficient to cause  
280 spontaneous PH. Additionally, we extended previous studies in mice<sup>18, 19</sup> and demonstrated that *Gdf2* knockout rats  
281 exhibit a less severe increase in pulmonary pressures and vascular resistance compared to *Gdf2*<sup>+/+</sup> rats when irreversible  
282 remodeling and severe PH are induced by MCT and SuHx. Furthermore, we showed that BMP receptor abundance,  
283 particularly ALK1, influenced both the endothelial transcriptional landscape and transcriptional responses to BMP-9 in  
284 human PMECs. Our observations also revealed that, similar to BMP-9 levels, the abundance of ALK1 had a significant  
285 impact on PMEC tube formation, migration, and proliferation. Moreover, our study highlighted a complex interplay  
286 existing between BMP-9, ALK1, and vascular endothelial growth factor (VEGF)/VEGFR activities.

287 ALK1-mediated endothelial BMP-9 signaling through Smad1/5/8 activation is well recognized to be critical for the  
288 maintenance of the endothelial integrity and stability, especially for the pulmonary endothelium that express high levels  
289 of BMPR-II, ALK1, and endoglin<sup>20</sup>. Consistent with this notion, loss-of-function mutations in *BMPR2*, *ALK1*, *ENG*,  
290 *GDF2*, *BMP10* and *CAVI* are known predisposing factors for the structural and functional remodeling of the pulmonary  
291 circulation that are characteristic of PAH. Also, loss-of-function mutations in *ALK1*, *ENG*, or *SMAD4*, and more rarely in  
292 *GDF2*, are known causes of hereditary hemorrhagic telangiectasia (HHT)-a rare vascular multisystemic disease that leads  
293 to epistaxis, anemia due to blood loss, and arteriovenous malformations (AVMs) in organs such as the lungs, liver and  
294 brain<sup>21, 22</sup>. Finally, recent reports of isolated pulmonary AVMs associated with *BMPR2* pathogenic variants highlight the  
295 complex pulmonary vascular consequences of genetic defects in the BMP-ALK1-Smad1/5/8 pathway<sup>23</sup>. Although PAH  
296 and HHT share defects of key common members of the BMP-ALK1-Smad1/5/8 pathway, the reasons of their markedly  
297 different clinical presentation and penetrance (<30% in PAH and 100% in HHT) are still currently unknown. Similarly,  
298 the reasons why human findings are challenged by experimental evidence in rodents remain debated. In mice, the  
299 knockdown of BMP-9 alone or associated with the loss of its structural analogue BMP-10, is indeed not sufficient to lead



300 to pulmonary vascular remodeling or the development of PH and unexpectedly protected against PH-induced by chronic  
301 hypoxia<sup>18, 19</sup>. Here, we partly reconcile some of these human and mouse observations by providing *in vivo* evidence in  
302 *Sprague Dawley* rats that BMP-9 is a negative regulator of pulmonary vascular network formation and a factor that  
303 promotes pulmonary vasoconstriction. Even if *Gdf2*<sup>-/-</sup> rats developed and grew normally with no obvious defects in  
304 appearance, size, or fertility, a careful examination of the pulmonary arterial tree indeed showed higher vessel volume  
305 and numbers of vascular junctions when compared with *Gdf2*<sup>+/+</sup> rats. This increased microvascular density and  
306 vasodilation may partly explain the less pronounced elevation in pulmonary vascular resistance and pressure in  
307 experimental PH in BMP-9 deficient rodents. These findings confirm and extend previous observations obtained in *Bmp*-  
308 *9* knockout mice and in C57BL/6 mice treated with neutralizing anti-BMP-9 antibodies showing the absence of  
309 spontaneous PH under normoxic conditions and the partial protection found in chronic hypoxia-induced PH model<sup>18, 19</sup>.  
310 These studies have reported that BMP-9 deficiency or its inhibition were associated with lower levels of endothelin (ET)-  
311 1 and higher levels of two potent vasodilator factors, apelin and adrenomedullin (ADM)<sup>18, 19</sup>. Here, we also showed that  
312 *Gdf2*<sup>-/-</sup> rats were partially protected against vascular remodeling- and PH-induced by chronic hypoxia, and extent these  
313 observations by showing that they were also partially protected against irreversible remodeling of the pulmonary  
314 vasculature and severe PH induced by MCT and SuHx.

315 The pulmonary microvascular endothelium is metabolically highly active, sensing and responding to signals from  
316 extracellular environments by secreting the correct substances by which it may maintain the vasomotor balance and  
317 vascular-tissue homeostasis<sup>24, 25</sup>. Therefore, PMECs have heterogeneous phenotypes that match the diverse structures  
318 and metabolic needs of each vascular beds present in the lungs. Consistent with this notion, it was recently reported that  
319 primary cultures of human pulmonary artery endothelial cells (PAECs) isolated from the main pulmonary artery and 1<sup>st</sup>-  
320 4<sup>th</sup> branches exhibited 4 distinct transcriptomic profiles among 8 different PAEC-clusters<sup>26</sup>. Here, primary cultures of  
321 PMECs derived from the distal parenchyma of human lungs (used at early passages < 4; n=5 subjects) in which small and  
322 medium-sized vessels are present were used. Our scRNA-seq analyses revealed 5 distinct PMEC-populations with 5  
323 specific transcriptomic profiles. Because the response to BMP depends on which type-1, type-2 and type-3 receptors are  
324 expressed by the signal-receiving cell, we used the PMEC diversity present in primary cultures of human cells to analyze  
325 the BMP-9 transcriptomic differences between ALK1<sup>high</sup> and ALK1<sup>low</sup> PMECs. ALK1 was indeed found to be the  
326 predominant type-1 receptor expressed, along with BMPRII, TGFβRII and endoglin and its abundance was ~1.5 higher  
327 in the cluster-5 (ALK1<sup>high</sup> PMECs) when compared with the other PMEC-clusters (ALK1<sup>low</sup> PMECs). A careful  
328 examination of the cellular phenotype in ALK1<sup>high</sup> PMECs indicated that C5 exhibited a pro-angiogenic signature at  
329 baseline that was attenuated in presence of exogenous BMP-9. A substantial response to BMP-9 was also observed in

330 ALK1<sup>low</sup> PMECs with specific transcriptomic signatures between the 4 distinct PMEC-clusters. Consistent with the  
331 notion that ALK1 is known to be a high-capacity receptor for low-density lipoprotein (LDL) <sup>27, 28</sup>, several GO/BP terms  
332 related to fatty acid and lipid transport and homeostasis were found in ALK1<sup>low</sup>, but not in ALK1<sup>low</sup> PMECs treated with  
333 BMP-9. Indeed, BMP-9 can control cell surface levels of ALK-1, via caveolin-1 to regulate both BMP-9 signaling and  
334 LDL transcytosis <sup>27</sup>. The effect of BMP-9 on ALK1 levels might partly explain why the pulmonary endothelium of *Gdf2*-  
335 *-/-* rats exhibited higher ALK1 levels than *Gdf2*<sup>+/+</sup> rats. As already reported <sup>17</sup>, we also found that BMP-9 participated in  
336 a positive feedback loop that increases BMPR-II in PMECs. Here, the same was noted for endoglin. These BMP-9-  
337 mediated changes in BMP receptors point out that the BMP-9 signaling is dynamically controlled by complex regulatory  
338 mechanisms. Using functional *in vitro* studies, we validated some of these scRNA-seq findings. Consistent with previous  
339 studies <sup>7</sup>, we first found that addition of exogenous BMP-9 on human PMEC cultures attenuated cell migration,  
340 proliferation and tube formation, while its removal with ALK1-Fc showed the opposite effects. Second, we found that  
341 attenuation of ALK1 acts as a critical modulator of endothelial phenotype, as reflected by the reduced PMEC migration,  
342 proliferation and tube formation observed with ALK1 siRNA-mediated knockdown or inhibition with ML 347. In the  
343 same line, a recent study has demonstrated that BMP-9 could act as an angiogenic switch that can either promote or  
344 prevent EC proliferation, depending of the BMPR-II level <sup>29</sup>. High levels of BMPR-II and/or ALK1 at the EC surface are  
345 therefore two important factors associated with high angiogenic potential of PMECs, which signaling is finely regulated  
346 by BMP-9.

347 Regulation of vascular development and pathological angiogenesis are regulated by many angiogenic factors,  
348 among which signals induced by the VEGF and BMP-9/ALK1 appear to play an important role. Consistent with the fact  
349 that enhanced VEGF signaling has already been associated with formation of large, dilated, and fragile blood vessels,  
350 which resembled AVMs <sup>30-32</sup>, we found that *Gdf2*<sup>-/-</sup> rat lungs displayed higher VEGF/VEGFR activities relative to  
351 *Gdf2*<sup>+/+</sup>. In addition, we found that exogenous BMP-9 was able to reduce the phosphorylation of VEGFR2 and its  
352 downstream signaling through SRC and AKT in cultured human PMECs. We also found that the ALK1<sup>high</sup> PMEC-cluster  
353 expressed higher levels of several VEGF ligands including of VEGF-C and placental growth factor (PGF), but also of  
354 VEGFR1 and VEGFR2 than the ALK1<sup>low</sup> PMEC-cluster. Interestingly, we also found that BMP-9 inhibited levels of  
355 VEGFR2, p-SRC, and p-AKT in human PMECs exposed to VEGF. The fact that BMP-9 and ALK1 are two strong  
356 modulators of VEGF-C expression is consistent with the fact that *Bmp9* KO mice have been reported to exhibit defects in  
357 lymphatic capillaries and collecting vessel maturation as well as in valve formation <sup>33-36</sup>. These observations are  
358 consistent with the key role played by a crosstalk between BMP-9/ALK1 and VEGF systems in HHT and other vascular  
359 diseases. Other studies have indeed also highlighted the intricate involvement of BMP-9/ALK1 in stabilizing the



360 arteriovenous network, with this effect being dependent on the specific vascular bed<sup>37,38</sup>. However, these crosstalks  
361 between BMP-9/ALK1 and VEGF systems can also contribute to the loss of the small pulmonary vessels in experimental  
362 and human PAH, through a mechanism entitled vascular “pruning” that leads to a pattern of vascular rarefaction (image  
363 in “dead tree”), a phenomenon that further exacerbates the elevation of pulmonary vascular resistance. In PAH, it is  
364 indeed suspected that the uncontrolled and chronic activation of the VEGF, and other pro-angiogenic pathways, might  
365 have deleterious effects on the formation of new vessels *per se*<sup>39-41</sup>. VEGF is indeed abundant in the lung, and a known  
366 critical factor for the maintenance of the pulmonary structures. A recent study has underlined that loss-of-function  
367 variants in *KDR* (encoding VEGFR2) are associated with a particular form of PAH characterized by a range of lung  
368 parenchymal abnormalities, including small airways disease, emphysema and mild pulmonary fibrosis<sup>42</sup>. A better  
369 understanding on how specific environmental and pathological factors present in HHT and PAH may influence the  
370 crosstalk between BMP-9/ALK1 and VEGF systems and therefore the disease onset, progression, and manifestation is  
371 clearly needed.

372 BMP-9 has also other functions, such as the ability to prevent vascular permeability, to attenuate EC apoptosis, and  
373 to maintain fenestration of sinusoidal liver ECs<sup>43</sup>. It also has been shown to cause the increase of vascular permeability in  
374 the lung<sup>17</sup>, and to protect ECs against the deleterious effect of inflammation by decreasing certain chemoattractants of  
375 leukocytes such as C-C motif chemokine ligand 2 (CCL2)<sup>44</sup>. Thus, beyond the scope of this study, there is a need for  
376 research to examine more in detail the specific roles and actions of BMP-9 in the preservation of other tissue, organ,  
377 structure integrity.

378 Taken together, our data identify BMP-9 and ALK1 as two critical factors for pulmonary vascular growth and  
379 remodeling *in vivo*. Our study is the first to point out that the higher pulmonary vessel density and vasodilation could  
380 partly explain why animals deficient in BMP-9 display lower susceptibility to develop pulmonary vascular remodeling  
381 and experimental PH. We also provided *in vitro* and *in vivo* molecular evidence that this phenotype is driven by a higher  
382 ALK1 expression and activation of the VEGFR2 signaling. This intricate interplay between the BMP/TGF $\beta$  and  
383 VEGF/VEGR pathways offers new possibilities for developing PAH medications targeting the TGF- $\beta$  superfamily, with  
384 the aim of restoring pulmonary vascular homeostasis<sup>45-47</sup>.

**Acknowledgments:** The authors thank Valérie Domergue and her team from the animal facility of UMS IPSIT for their help with the animals. The authors acknowledge Vincent Thomas de Montpreville and all pathologists and technicians from the Centre de Recherche Biologique at Marie Lannelongue Hospital - Groupe Hospitalier Paris Saint Joseph for their expertise and support. They also thank the French PAH patient association (HTAP France) and all participants of the French PH Network PulmoTension.

**Authors' contributions:** Conception and design: NB, LT, CG; Analysis and interpretation: all; Drafting manuscript: NB, LT, CG. SR and IA generated the *Gdf2*<sup>-/-</sup> KO rats.

**Source of Funding:** This research was supported by grants from the French National Institute for Health and Medical Research (INSERM), the Université Paris-Saclay, the Marie Lannelongue Hospital, the Fondation pour la Recherche Médicale (FRM) grants no. EQU202203014670 and DEQ20180339158 (FRM), the French National Agency for Research (ANR) grants n° ANR-16-CE17-0014 and ANR-17-CE14-0006, ANR-19-CE14-0027, ANR-19-P3IA-0002-3IA and in part by the Assistance Publique-Hôpitaux de Paris (AP-HP), Service de Pneumologie, Centre de Référence de l'Hypertension Pulmonaire Sévère, the french Fonds de Dotation « Recherche en Santé Respiratoire » - (FRSR) - Fondation du Souffle (FdS), the Conseil Départemental des Alpes Maritimes (2016-294DGADSH-CV), The National Infrastructure France Génomique (Commissariat aux Grands Investissements) [ANR-10-INBS-09-03, ANR-10-INBS-09-02]; the 3IA@coted'azur [ANR-19-P3IA-0002], and the PPIA 4D-OMICS [21-ESRE-0052]. N. B. is a recipient of a PhD fellowship from the Ile-de-France region (ARDoc Health).

**Conflict of Interests Disclosures:** Over the last three years, C.G. reports grants from Acceleron Pharma (Cambridge, MA, USA), a wholly-owned subsidiary of Merck & Co., Inc. (Rahway, NJ, USA), MSD, Corteria, Structure therapeutics (ex ShouTi), and Janssen, outside the submitted work. M.H. reports grants and personal fees from Acceleron, Aerovate, Altavant, AOP Orphan, Bayer, Chiesi, Ferrer, Janssen, Merck, MorphogenIX and United Therapeutics, outside the submitted work.

### **Supplemental Materials:**

*Table S1-2*

*Figure S1-6*

## References:

1. Humbert M, Kovacs G, Hoepfer MM, Badagliacca R, Berger RMF, Brida M, Carlsen J, Coats AJS, Escribano-Subias P, Ferrari P, Ferreira DS, Ghofrani HA, Giannakoulas G, Kiely DG, Mayer E, Meszaros G, Nagavci B, Olsson KM, Pepke-Zaba J, Quint JK, Radegran G, Simonneau G, Sitbon O, Tonia T, Toshner M, Vachiery JL, Vonk Noordegraaf A, Delcroix M, Rosenkranz S and Group EESD. 2022 ESC/ERS Guidelines for the diagnosis and treatment of pulmonary hypertension. *Eur Respir J*. 2023;61.
2. Humbert M, Guignabert C, Bonnet S, Dorfmueller P, Klinger JR, Nicolls MR, Olschewski AJ, Pullamsetti SS, Schermuly RT, Stenmark KR and Rabinovitch M. Pathology and pathobiology of pulmonary hypertension: state of the art and research perspectives. *Eur Respir J*. 2019;53.
3. Boucly A, Weatherald J, Savale L, Jais X, Cottin V, Prevot G, Picard F, de Groote P, Jevnikar M, Bergot E, Chaouat A, Chabanne C, Bourdin A, Parent F, Montani D, Simonneau G, Humbert M and Sitbon O. Risk assessment, prognosis and guideline implementation in pulmonary arterial hypertension. *Eur Respir J*. 2017;50.
4. Aldred MA, Morrell NW and Guignabert C. New Mutations and Pathogenesis of Pulmonary Hypertension: Progress and Puzzles in Disease Pathogenesis. *Circulation research*. 2022;130:1365-1381.
5. Menoret S, De Cian A, Tesson L, Remy S, Usal C, Boule JB, Boix C, Fontaniere S, Creneguy A, Nguyen TH, Brusselle L, Thinard R, Gauguier D, Concordet JP, Cherifi Y, Fraichard A, Giovannangeli C and Anegon I. Homology-directed repair in rodent zygotes using Cas9 and TALEN engineered proteins. *Sci Rep*. 2015;5:14410.
6. Chenouard V, Brusselle L, Heslan JM, Remy S, Menoret S, Usal C, Ouisse LH, TH NG, Anegon I and Tesson L. A Rapid and Cost-Effective Method for Genotyping Genome-Edited Animals: A Heteroduplex Mobility Assay Using Microfluidic Capillary Electrophoresis. *J Genet Genomics*. 2016;43:341-8.
7. David L, Mallet C, Mazerbourg S, Feige JJ and Bailly S. Identification of BMP9 and BMP10 as functional activators of the orphan activin receptor-like kinase 1 (ALK1) in endothelial cells. *Blood*. 2007;109:1953-61.
8. Kojonazarov B, Hadzic S, Ghofrani HA, Grimminger F, Seeger W, Weissmann N and Schermuly RT. Severe Emphysema in the SU5416/Hypoxia Rat Model of Pulmonary Hypertension. *Am J Respir Crit Care Med*. 2019;200:515-518.
9. Tu L, Thuillet R, Perrot J, Ottaviani M, Ponsardin E, Kolkhof P, Humbert M, Viengchareun S, Lombes M and Guignabert C. Mineralocorticoid Receptor Antagonism by Finerenone Attenuates Established Pulmonary Hypertension in Rats. *Hypertension*. 2022;79:2262-2273.
10. Tu L, Dewachter L, Gore B, Fadel E, Darteville P, Simonneau G, Humbert M, Eddahibi S and Guignabert C. Autocrine fibroblast growth factor-2 signaling contributes to altered endothelial phenotype in pulmonary hypertension. *Am J Respir Cell Mol Biol*. 2011;45:311-22.
11. Bordenave J, Tu L, Berrebeh N, Thuillet R, Cumont A, Le Vely B, Fadel E, Nadaud S, Savale L, Humbert M, Huertas A and Guignabert C. Lineage Tracing Reveals the Dynamic Contribution of Pericytes to the Blood Vessel Remodeling in Pulmonary Hypertension. *Arterioscler Thromb Vasc Biol*. 2020;40:766-782.
12. Tu L, De Man FS, Girerd B, Huertas A, Chaumais MC, Lecerf F, Francois C, Perros F, Dorfmueller P, Fadel E, Montani D, Eddahibi S, Humbert M and Guignabert C. A critical role for p130Cas in the progression of pulmonary hypertension in humans and rodents. *Am J Respir Crit Care Med*. 2012;186:666-76.
13. Stoeckius M, Hafemeister C, Stephenson W, Houck-Loomis B, Chattopadhyay PK, Swerdlow H, Satija R and Smibert P. Simultaneous epitope and transcriptome measurement in single cells. *Nat Methods*. 2017;14:865-868.
14. Hao Y, Hao S, Andersen-Nissen E, Mauck WM, 3rd, Zheng S, Butler A, Lee MJ, Wilk AJ, Darby C, Zager M, Hoffman P, Stoeckius M, Papalexi E, Mimitou EP, Jain J, Srivastava A, Stuart T, Fleming LM, Yeung B, Rogers AJ, McElrath JM, Blish CA, Gottardo R, Smibert P and Satija R. Integrated analysis of multimodal single-cell data. *Cell*. 2021;184:3573-3587 e29.
15. Haghverdi L, Lun ATL, Morgan MD and Marioni JC. Batch effects in single-cell RNA-sequencing data are corrected by matching mutual nearest neighbors. *Nat Biotechnol*. 2018;36:421-427.
16. Yu G, Wang LG, Han Y and He QY. clusterProfiler: an R package for comparing biological themes among gene clusters. *OMICS*. 2012;16:284-7.
17. Long L, Ormiston ML, Yang X, Southwood M, Graf S, Machado RD, Mueller M, Kinzel B, Yung LM, Wilkinson JM, Moore SD, Drake KM, Aldred MA, Yu PB, Upton PD and Morrell NW. Selective enhancement of endothelial BMPR-II with BMP9 reverses pulmonary arterial hypertension. *Nat Med*. 2015;21:777-85.
18. Bouvard C, Tu L, Rossi M, Desroches-Castan A, Berrebeh N, Helfer E, Roelants C, Liu H, Ouarne M, Chaumontel N, Mallet C, Battail C, Bikfalvi A, Humbert M, Savale L, Daubon T, Perret P, Tillet E, Guignabert C and Bailly S. Different cardiovascular and pulmonary phenotypes for single- and double-knock-out mice deficient in BMP9 and BMP10. *Cardiovasc Res*. 2021.

19. Tu L, Desroches-Castan A, Mallet C, Guyon L, Cumont A, Phan C, Robert F, Thuillet R, Bordenave J, Sekine A, Huertas A, Ritvos O, Savale L, Feige JJ, Humbert M, Bailly S and Guignabert C. Selective BMP-9 Inhibition Partially Protects Against Experimental Pulmonary Hypertension. *Circulation research*. 2019;124:846-855.
20. Guignabert C and Humbert M. Targeting transforming growth factor-beta receptors in pulmonary hypertension. *Eur Respir J*. 2021;57.
21. Shovlin CL, Buscarini E, Sabba C, Mager HJ, Kjeldsen AD, Pagella F, Sure U, Ugolini S, Torring PM, Suppressa P, Rennie C, Post MC, Patel MC, Nielsen TH, Manfredi G, Lenato GM, Lefroy D, Kariholu U, Jones B, Fialla AD, Eker OF, Dupuis O, Droege F, Coote N, Boccardi E, Alsafi A, Alicante S and Dupuis-Girod S. The European Rare Disease Network for HHT Frameworks for management of hereditary haemorrhagic telangiectasia in general and speciality care. *Eur J Med Genet*. 2022;65:104370.
22. Robert F, Desroches-Castan A, Bailly S, Dupuis-Girod S and Feige JJ. Future treatments for hereditary hemorrhagic telangiectasia. *Orphanet J Rare Dis*. 2020;15:4.
23. Kularatne M, Eyries M, Savale L, Humbert M and Montani D. Isolated Pulmonary Arteriovenous Malformations Associated With BMPR2 Pathogenic Variants. *Chest*. 2023.
24. Huertas A, Guignabert C, Barbera JA, Bartsch P, Bhattacharya J, Bhattacharya S, Bonsignore MR, Dewachter L, Dinh-Xuan AT, Dorfmueller P, Gladwin MT, Humbert M, Kotsimbos T, Vassilakopoulos T, Sanchez O, Savale L, Testa U and Wilkins MR. Pulmonary vascular endothelium: the orchestra conductor in respiratory diseases: Highlights from basic research to therapy. *Eur Respir J*. 2018;51.
25. Ricard N, Bailly S, Guignabert C and Simons M. The quiescent endothelium: signalling pathways regulating organ-specific endothelial normalcy. *Nat Rev Cardiol*. 2021;18:565-580.
26. Asosingh K, Comhair S, Mavrakis L, Xu W, Horton D, Taylor I, Tkachenko S, Hu B and Erzurum S. Single-cell transcriptomic profile of human pulmonary artery endothelial cells in health and pulmonary arterial hypertension. *Sci Rep*. 2021;11:14714.
27. Tao B, Kraehling JR, Ghaffari S, Ramirez CM, Lee S, Fowler JW, Lee WL, Fernandez-Hernando C, Eichmann A and Sessa WC. BMP-9 and LDL crosstalk regulates ALK-1 endocytosis and LDL transcytosis in endothelial cells. *J Biol Chem*. 2020;295:18179-18188.
28. Lee S, Schleer H, Park H, Jang E, Boyer M, Tao B, Gamez-Mendez A, Singh A, Folta-Stogniew E, Zhang X, Qin L, Xiao X, Xu L, Zhang J, Hu X, Pashos E, Tellides G, Shaul PW, Lee WL, Fernandez-Hernando C, Eichmann A and Sessa WC. Genetic or therapeutic neutralization of ALK1 reduces LDL transcytosis and atherosclerosis in mice. *Nature Cardiovascular Research*. 2023;2:438-448.
29. Theilmann AL, Hawke LG, Hilton LR, Whitford MKM, Cole DV, Mackeill JL, Dunham-Snary KJ, Mewburn J, James PD, Maurice DH, Archer SL and Ormiston ML. Endothelial BMPR2 Loss Drives a Proliferative Response to BMP (Bone Morphogenetic Protein) 9 via Prolonged Canonical Signaling. *Arterioscler Thromb Vasc Biol*. 2020;40:2605-2618.
30. Ozawa CR, Banfi A, Glazer NL, Thurston G, Springer ML, Kraft PE, McDonald DM and Blau HM. Microenvironmental VEGF concentration, not total dose, determines a threshold between normal and aberrant angiogenesis. *The Journal of clinical investigation*. 2004;113:516-27.
31. Sadick H, Naim R, Gossler U, Hormann K and Riedel F. Angiogenesis in hereditary hemorrhagic telangiectasia: VEGF165 plasma concentration in correlation to the VEGF expression and microvessel density. *Int J Mol Med*. 2005;15:15-9.
32. Sundberg C, Nagy JA, Brown LF, Feng D, Eckelhoefer IA, Manseau EJ, Dvorak AM and Dvorak HF. Glomeruloid microvascular proliferation follows adenoviral vascular permeability factor/vascular endothelial growth factor-164 gene delivery. *Am J Pathol*. 2001;158:1145-60.
33. Levet S, Ciais D, Merdzhanova G, Mallet C, Zimmers TA, Lee SJ, Navarro FP, Texier I, Feige JJ, Bailly S and Vittet D. Bone morphogenetic protein 9 (BMP9) controls lymphatic vessel maturation and valve formation. *Blood*. 2013;122:598-607.
34. Yoshimatsu Y, Lee YG, Akatsu Y, Taguchi L, Suzuki HI, Cunha SI, Maruyama K, Suzuki Y, Yamazaki T, Katsura A, Oh SP, Zimmers TA, Lee SJ, Pietras K, Koh GY, Miyazono K and Watabe T. Bone morphogenetic protein-9 inhibits lymphatic vessel formation via activin receptor-like kinase 1 during development and cancer progression. *Proc Natl Acad Sci U S A*. 2013;110:18940-5.
35. Subileau M, Merdzhanova G, Ciais D, Collin-Faure V, Feige JJ, Bailly S and Vittet D. Bone Morphogenetic Protein 9 Regulates Early Lymphatic-Specified Endothelial Cell Expansion during Mouse Embryonic Stem Cell Differentiation. *Stem Cell Reports*. 2019;12:98-111.

36. Aukema SM, Ten Brinke GA, Timens W, Vos YJ, Accord RE, Kraft KE, Santing MJ, Morssink LP, Streefland E, van Diemen CC, Vrijlandt EJ, Hulzebos CV and Kerstjens-Frederikse WS. A homozygous variant in growth and differentiation factor 2 (GDF2) may cause lymphatic dysplasia with hydrothorax and nonimmune hydrops fetalis. *Am J Med Genet A*. 2020;182:2152-2160.
37. Ntumba K, Akla N, Oh SP, Eichmann A and Larrivee B. BMP9/ALK1 inhibits neovascularization in mouse models of age-related macular degeneration. *Oncotarget*. 2016;7:55957-55969.
38. Hwan Kim Y, Vu PN, Choe SW, Jeon CJ, Arthur HM, Vary CPH, Lee YJ and Oh SP. Overexpression of Activin Receptor-Like Kinase 1 in Endothelial Cells Suppresses Development of Arteriovenous Malformations in Mouse Models of Hereditary Hemorrhagic Telangiectasia. *Circulation research*. 2020;127:1122-1137.
39. Hirose S, Hosoda Y, Furuya S, Otsuki T and Ikeda E. Expression of vascular endothelial growth factor and its receptors correlates closely with formation of the plexiform lesion in human pulmonary hypertension. *Pathol Int*. 2000;50:472-9.
40. Tudor RM, Chacon M, Alger L, Wang J, Taraseviciene-Stewart L, Kasahara Y, Cool CD, Bishop AE, Geraci M, Semenza GL, Yacoub M, Polak JM and Voelkel NF. Expression of angiogenesis-related molecules in plexiform lesions in severe pulmonary hypertension: evidence for a process of disordered angiogenesis. *J Pathol*. 2001;195:367-74.
41. Voelkel NF and Gomez-Arroyo J. The role of vascular endothelial growth factor in pulmonary arterial hypertension. The angiogenesis paradox. *Am J Respir Cell Mol Biol*. 2014;51:474-84.
42. Eyries M, Montani D, Girerd B, Favrolt N, Riou M, Faivre L, Manaud G, Perros F, Graf S, Morrell NW, Humbert M and Soubrier F. Familial pulmonary arterial hypertension by KDR heterozygous loss of function. *Eur Respir J*. 2020;55.
43. Desroches-Castan A, Tillet E, Ricard N, Ouarne M, Mallet C, Belmudes L, Coute Y, Boillot O, Scoazec JY, Bailly S and Feige JJ. Bone Morphogenetic Protein 9 Is a Paracrine Factor Controlling Liver Sinusoidal Endothelial Cell Fenestration and Protecting Against Hepatic Fibrosis. *Hepatology*. 2019;70:1392-1408.
44. Upton PD, Park JES, De Souza PM, Davies RJ, Griffiths MJD, Wort SJ and Morrell NW. Endothelial protective factors BMP9 and BMP10 inhibit CCL2 release by human vascular endothelial cells. *J Cell Sci*. 2020;133.
45. Hoepfer MM, Badesch DB, Ghofrani HA, Gibbs JSR, Gomberg-Maitland M, McLaughlin VV, Preston IR, Souza R, Waxman AB, Grunig E, Kopec G, Meyer G, Olsson KM, Rosenkranz S, Xu Y, Miller B, Fowler M, Butler J, Koglin J, de Oliveira Pena J, Humbert M and Investigators ST. Phase 3 Trial of Sotatercept for Treatment of Pulmonary Arterial Hypertension. *N Engl J Med*. 2023.
46. Humbert M, McLaughlin V, Gibbs JSR, Gomberg-Maitland M, Hoepfer MM, Preston IR, Souza R, Waxman A, Escribano Subias P, Feldman J, Meyer G, Montani D, Olsson KM, Manimaran S, Barnes J, Linde PG, de Oliveira Pena J, Badesch DB and Investigators PT. Sotatercept for the Treatment of Pulmonary Arterial Hypertension. *N Engl J Med*. 2021;384:1204-1215.
47. Humbert M, McLaughlin V, Gibbs JSR, Gomberg-Maitland M, Hoepfer MM, Preston IR, Souza R, Waxman AB, Ghofrani HA, Escribano Subias P, Feldman J, Meyer G, Montani D, Olsson KM, Manimaran S, de Oliveira Pena J and Badesch DB. Sotatercept for the treatment of pulmonary arterial hypertension: PULSAR open-label extension. *Eur Respir J*. 2023;61.



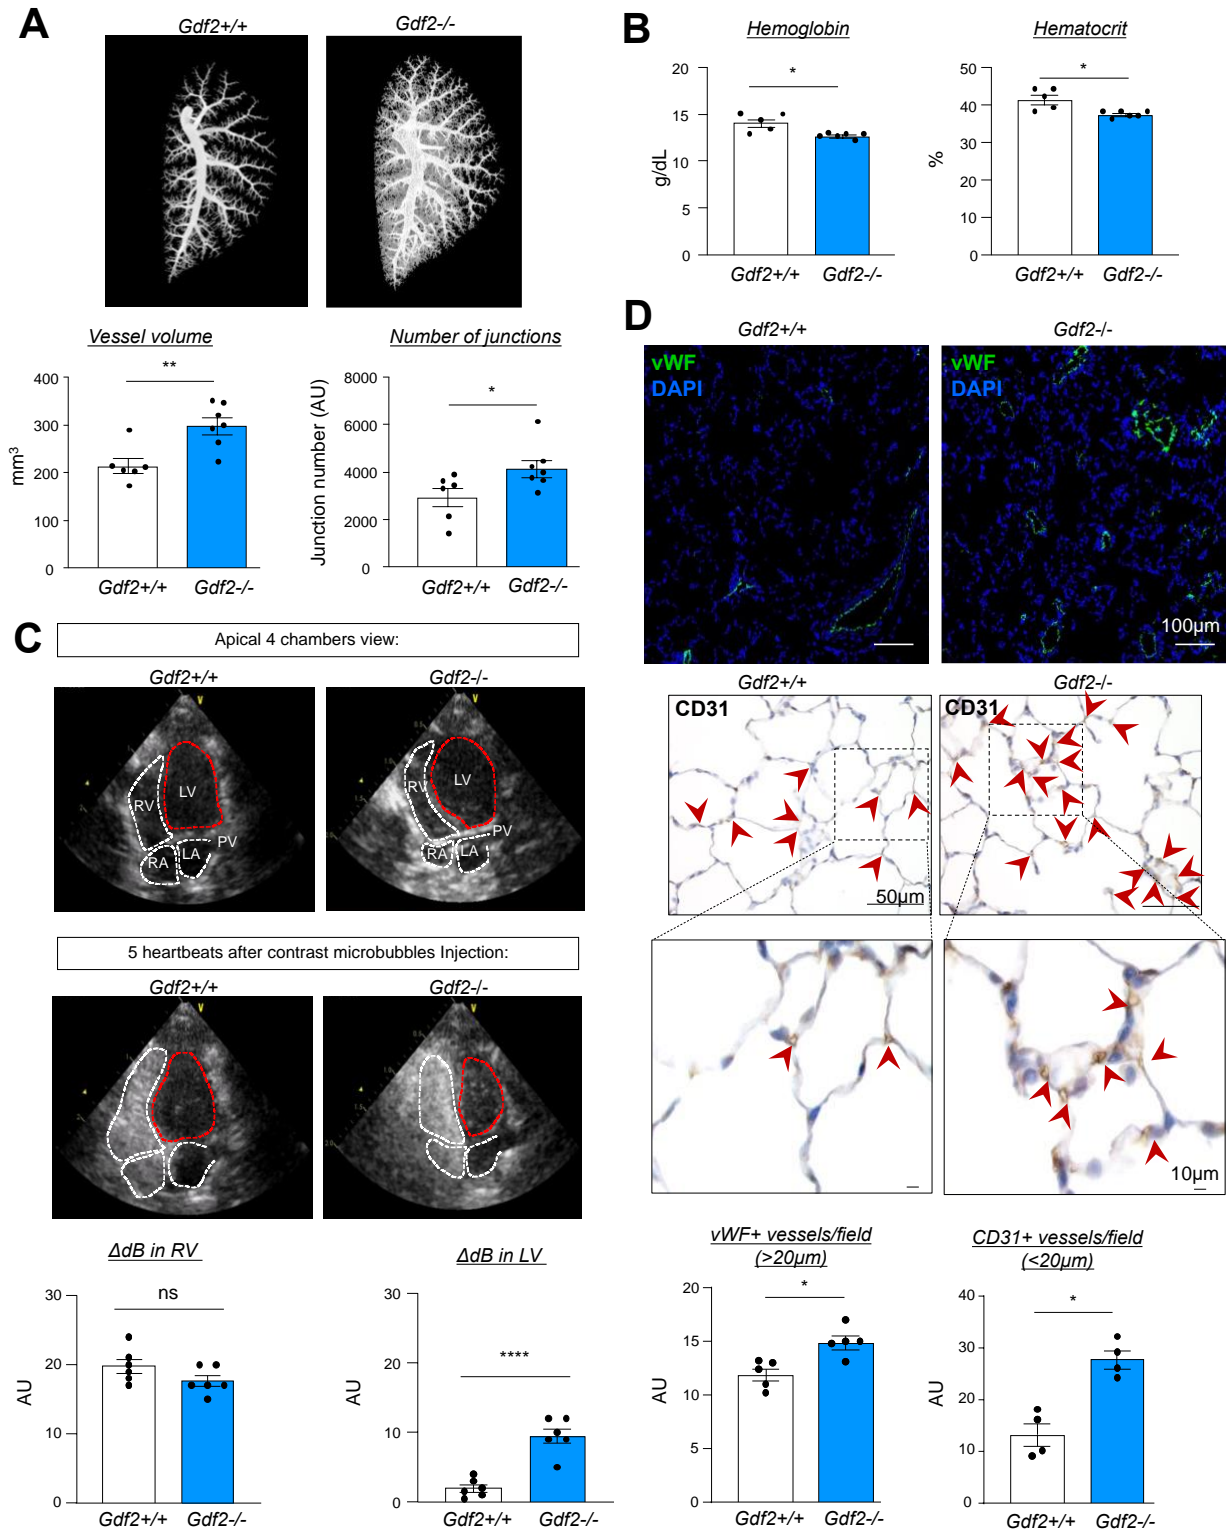

**Figure 1: *Gdf2*<sup>-/-</sup> rats exhibit structural and functional abnormalities of the pulmonary vascular bed.**

(A) representative images using X ray micro-angiography showing the left lung pulmonary vascular bed with quantification of the vessel volume and the number of junctions. (B) Hemoglobin and hematocrit measurements showing a decrease in *Gdf2*<sup>-/-</sup> rats. (C) contrast enhanced ultrasound imaging and quantification of the passage of microbubbles in the left ventricle in *Gdf2*<sup>-/-</sup> rats. (D) Quantification of pulmonary vessel density based on CD31 and von Willebrand factor (vWF) staining expressed as the number of positive vessels measured in 20 fields. Red arrows represent CD31+ cells. Data are represented as mean± SEM. Comparisons were made using the nonparametric Mann-Whitney t-test. \* p<0.05; \*\* p<0.01; \*\*\*\*, p<0.0001. Scale bar = 50µm for CD31 staining and 100µm for vWF immunostaining. AU = arbitrary unit. DAPI = 4',6-diamidino-2-phenylindole. ΔdB = change in decibel levels. LV = left ventricle. RV = right ventricle. ns = non significant.

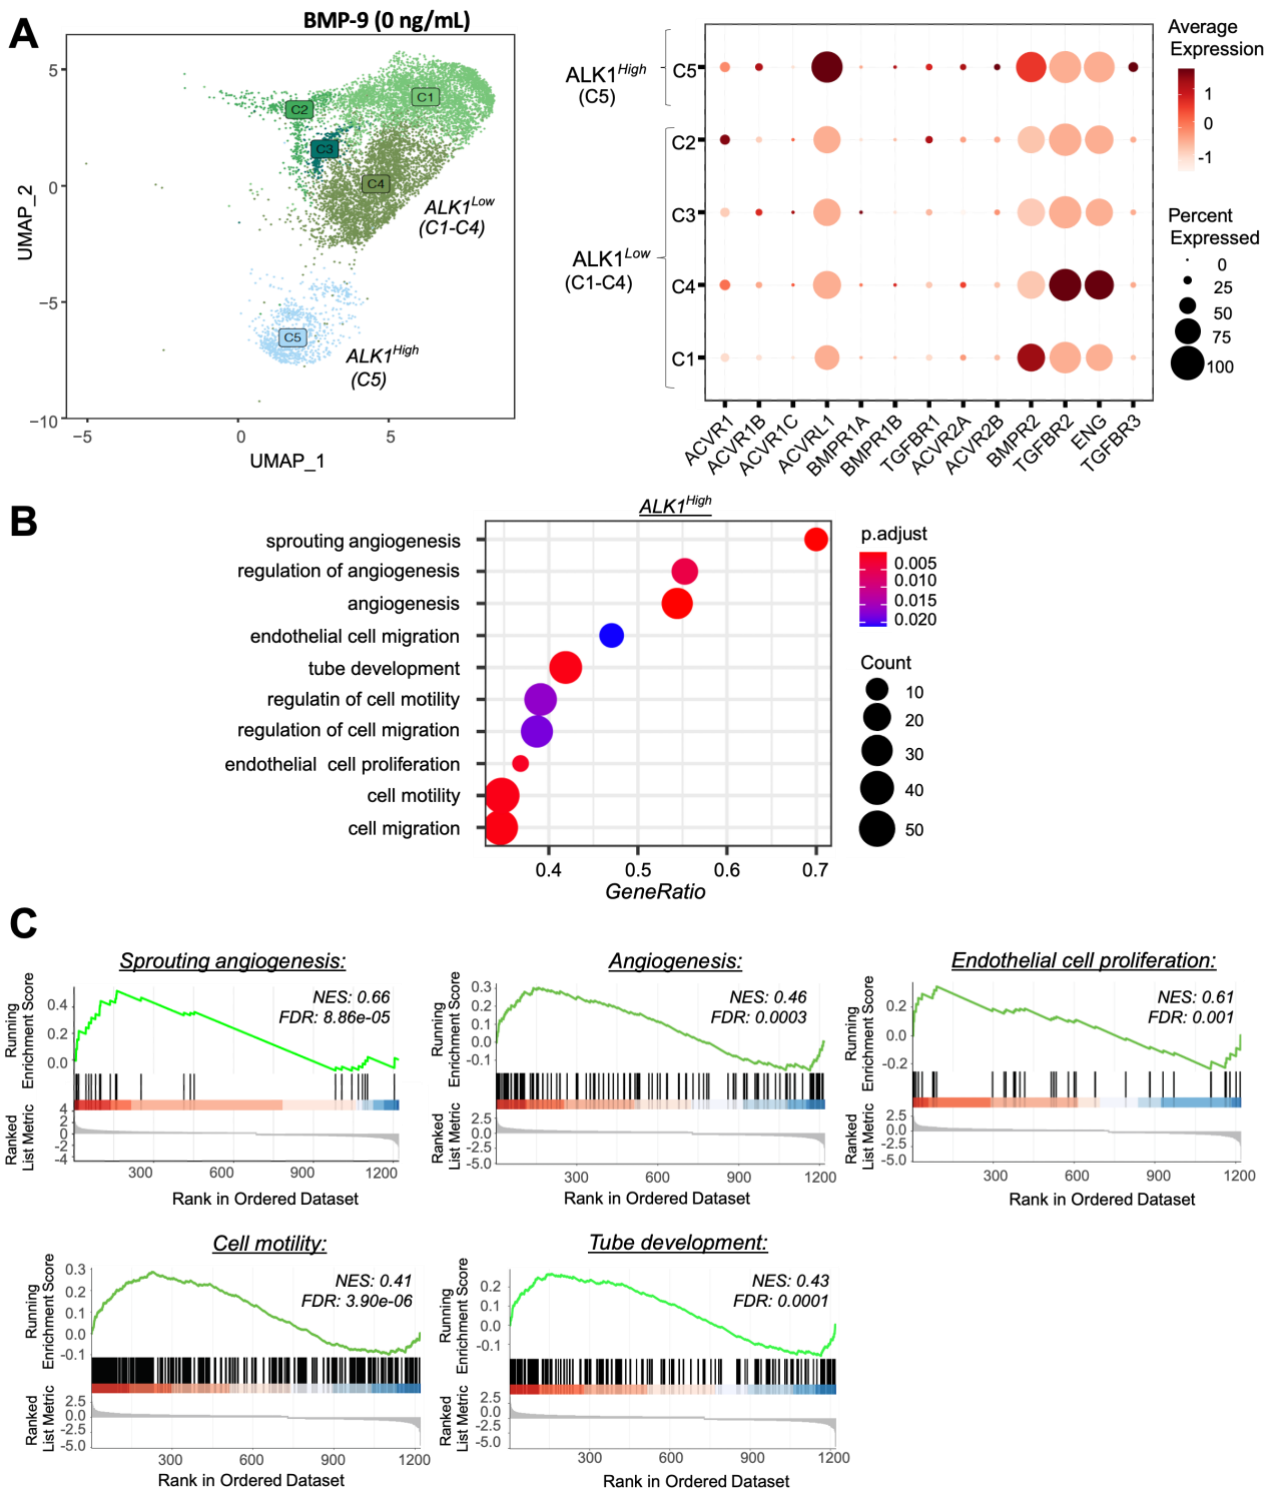

**Figure 2:** scRNA-seq analyses revealed 5 distinct populations of human pulmonary microvascular ECs (PMECs) that naturally expressed different patterns of BMP/TGF- $\beta$  receptors in primary EC cultures derived from human lung tissue. (A) Transcriptomic profile of each cell (dots) represented by a Uniform Manifold Approximation and Projection (UMAP), noted from C1 to 5 in the basal state and differential expression of BMP receptors in the five clusters (n=5), the clusters can be subdivided on two subgroups based on ALK1 expression: ALK1<sup>high</sup> and ALK1<sup>low</sup>. (B) TOP 10 GO terms that characterized the ALK1<sup>high</sup> PMEC population. (C) Gene set enrichment analysis (GSEA) of differentially expressed genes (DEGs) between ALK1<sup>high</sup> versus ALK1<sup>low</sup> PMECs. NES: normalized enrichment score ; FDR: false discovery rate.

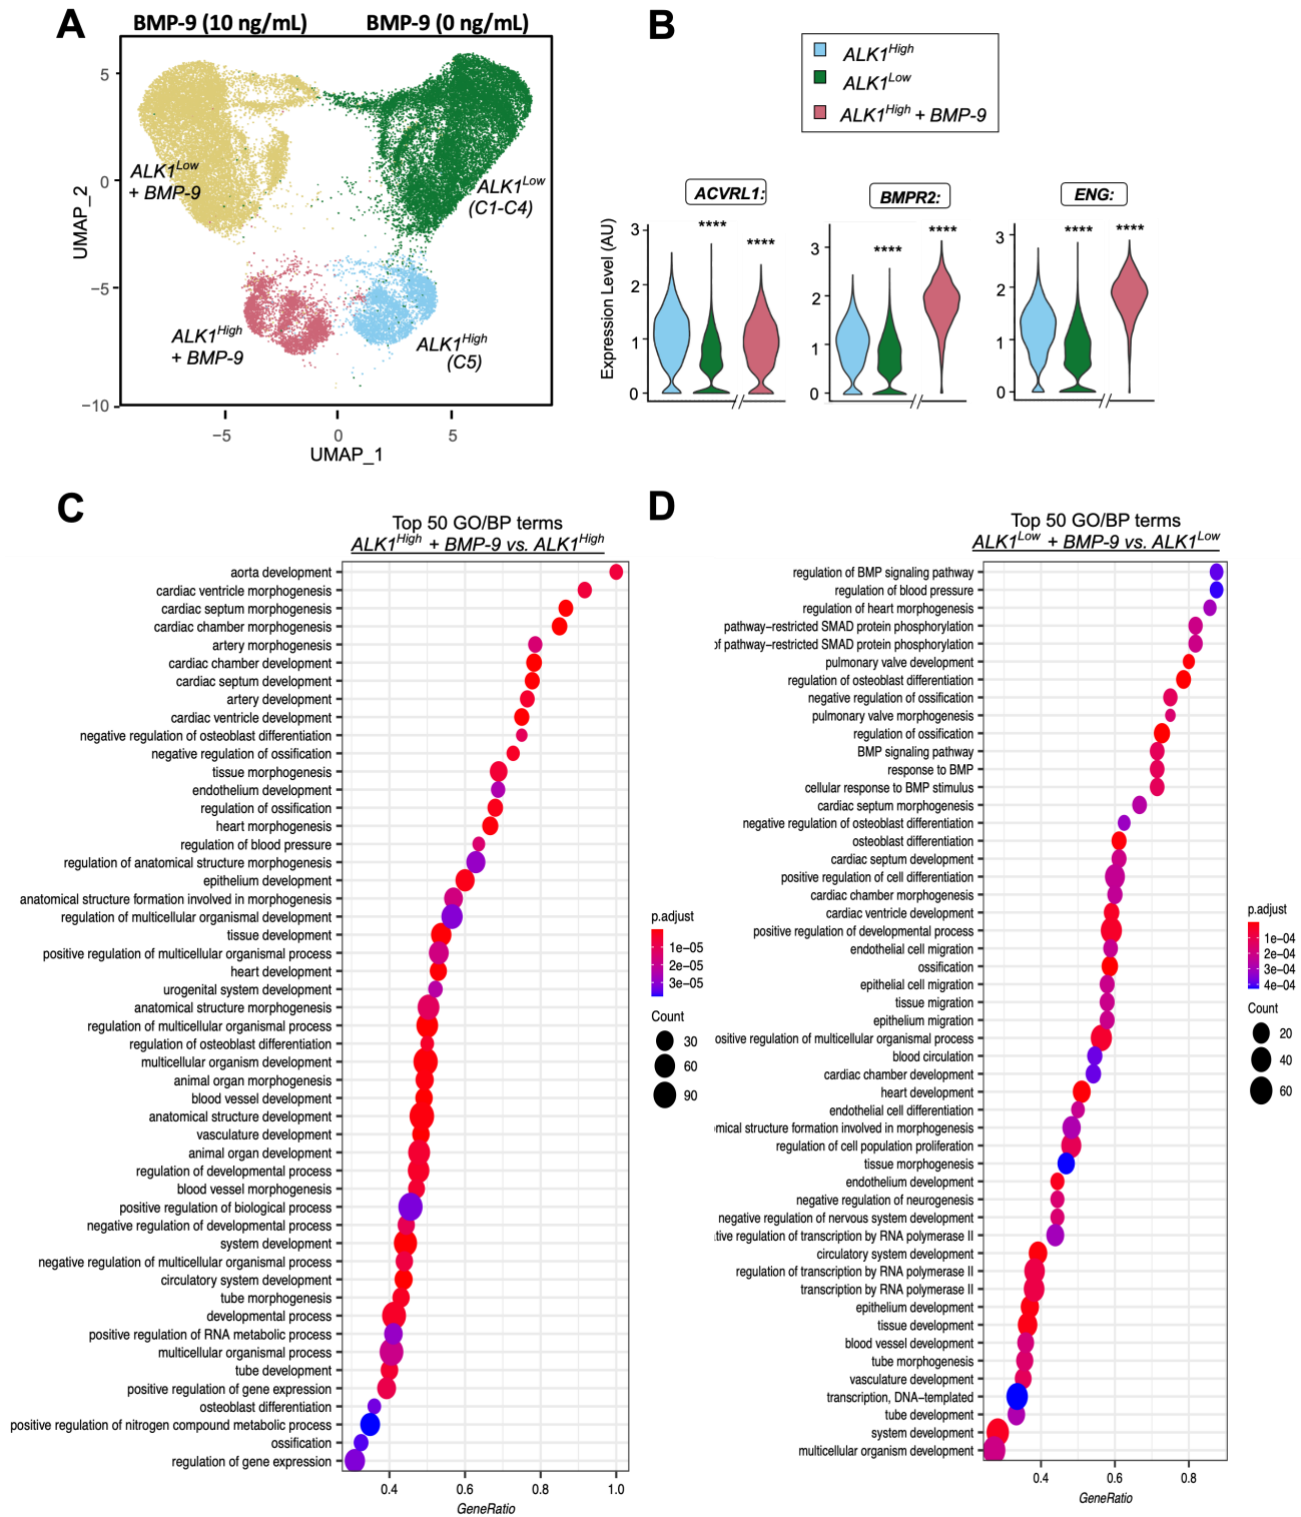

**Figure 3: Presence of distinct transcriptional signatures of BMP-9 responses in cultured human pulmonary microvascular ECs (PMECs).** (A) UMAP illustration showing changes in the transcriptomic profile in  $ALK1^{high}$  and  $ALK1^{low}$  PMEC-clusters 4h after BMP-9 stimulation (10ng/mL). (B) Violin plots of standardized expression of the main BMP-9 receptors across  $ALK1^{high}$  and  $ALK1^{low}$  PMEC-clusters with or without BMP-9 stimulation. TOP 50 *Gene Ontology/Biological Process* (GO/BP) terms that characterized the BMP-9 responses in  $ALK1^{high}$  (C) and  $ALK1^{low}$  PMEC-clusters (D). Data are represented as mean $\pm$  SEM. Significance was measured using nonparametric Mann-Whitney t-test: \*\*\*\*,  $p < 0.0001$  compared to  $ALK1^{high}$ .



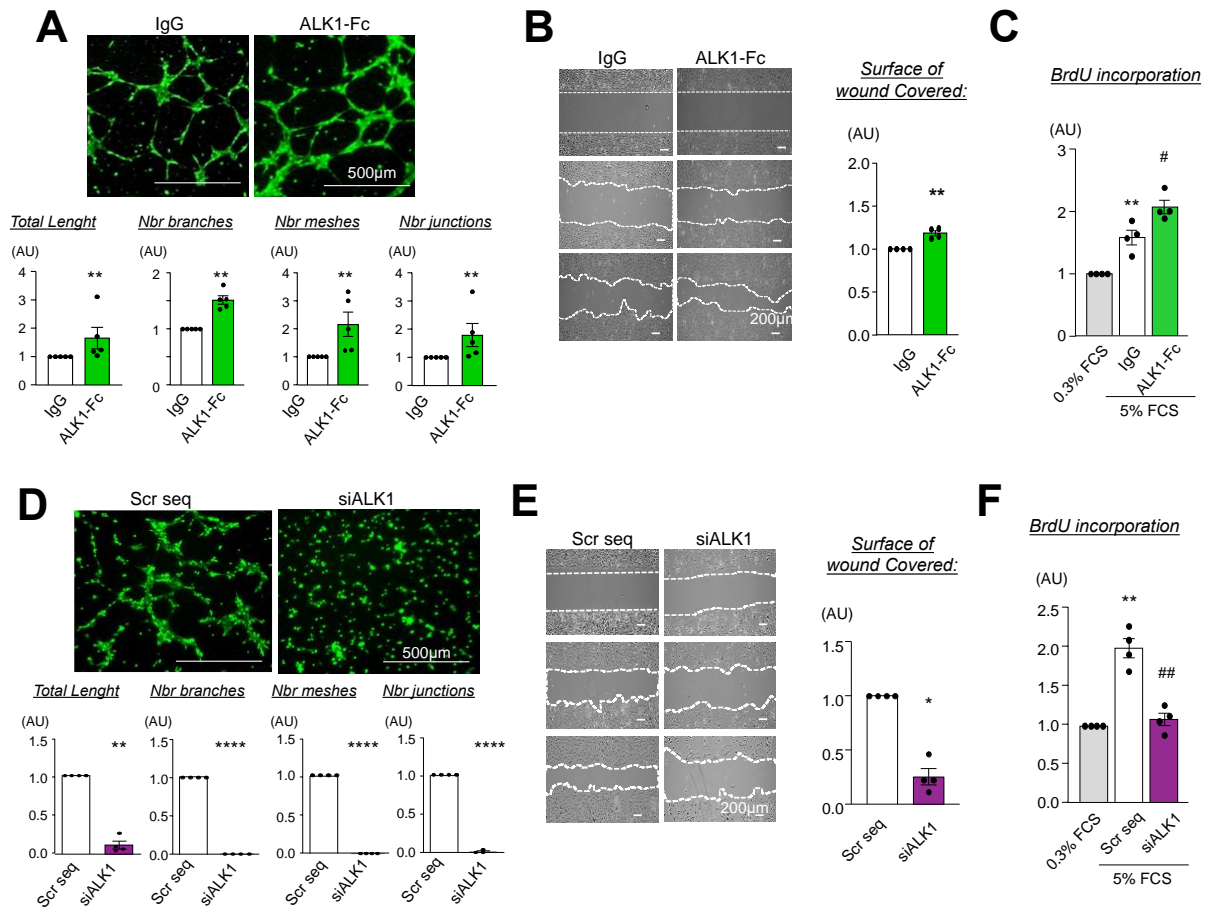

**Figure 4: Impact of decreasing BMP-9 and ALK1 levels using ALK1-Fc and siRNA on the capacity of human PMECs to form tubes and to their migratory and proliferative potentials.** (A) Representative images and quantifications of tube formation by human PMECs exposed to non-relevant IgG or ALK1-Fc (300ng/mL). (B) Representative images and quantifications of the surface of wound covered by human PMECs exposed to non-relevant IgG or ALK1-Fc (300ng/mL). (C) Effects of BMP-9 and siALK1 on BrdU incorporation in human PMECs. (D-F) Effects of non-relevant IgG or ALK1-Fc (300ng/mL) on tube formation, migration and proliferation of human PMECs. Data are represented as mean± SEM. Significance was measured using parametric paired t-test or 1-way ANOVA with Tukey post hoc tests: \*, p<0.05; \*\*, p<0.01; \*\*\*\*, p<0.0001 versus IgG, Scr sequence or 0.3% fetal calf serum (FCS). #, p<0.05; ##, p<0.01 versus Scr seq. AU: arbitrary unit. ALK1-Fc: soluble chimeric protein consisting of the extracellular part of ALK1 fused to a Fc fragment. IgG: immunoglobulin G. Nbr: number. BrdU: bromodeoxyuridine

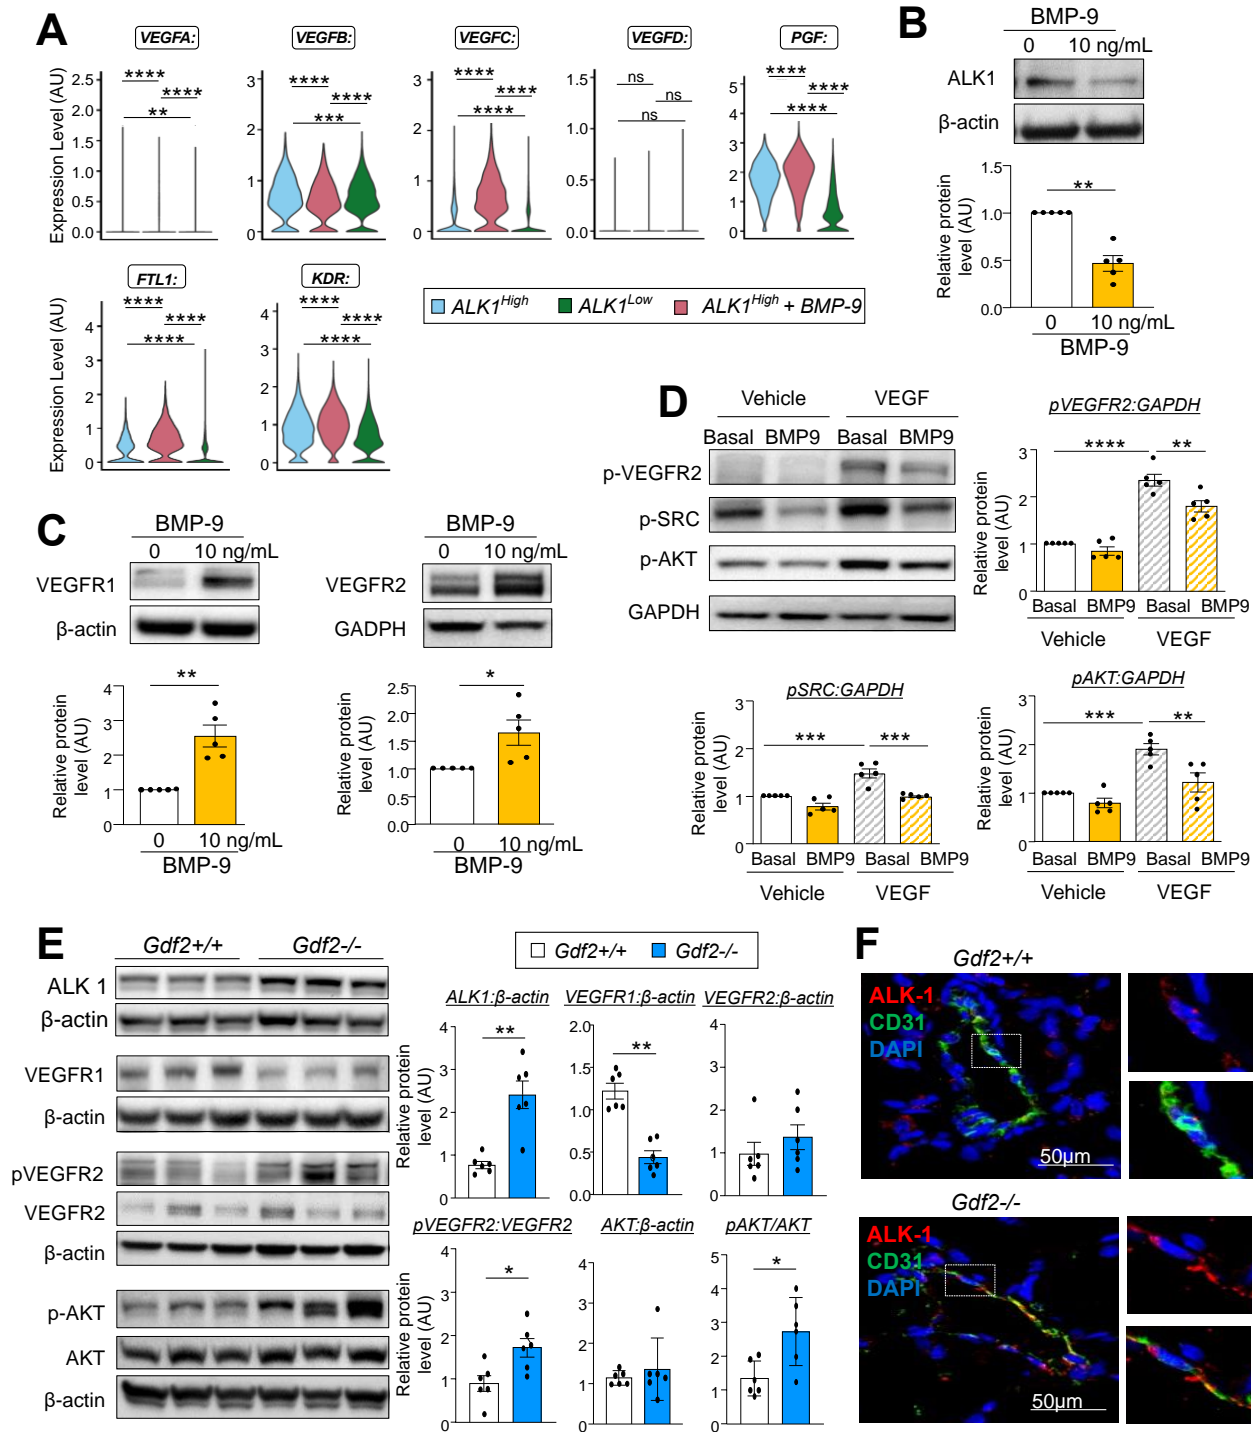

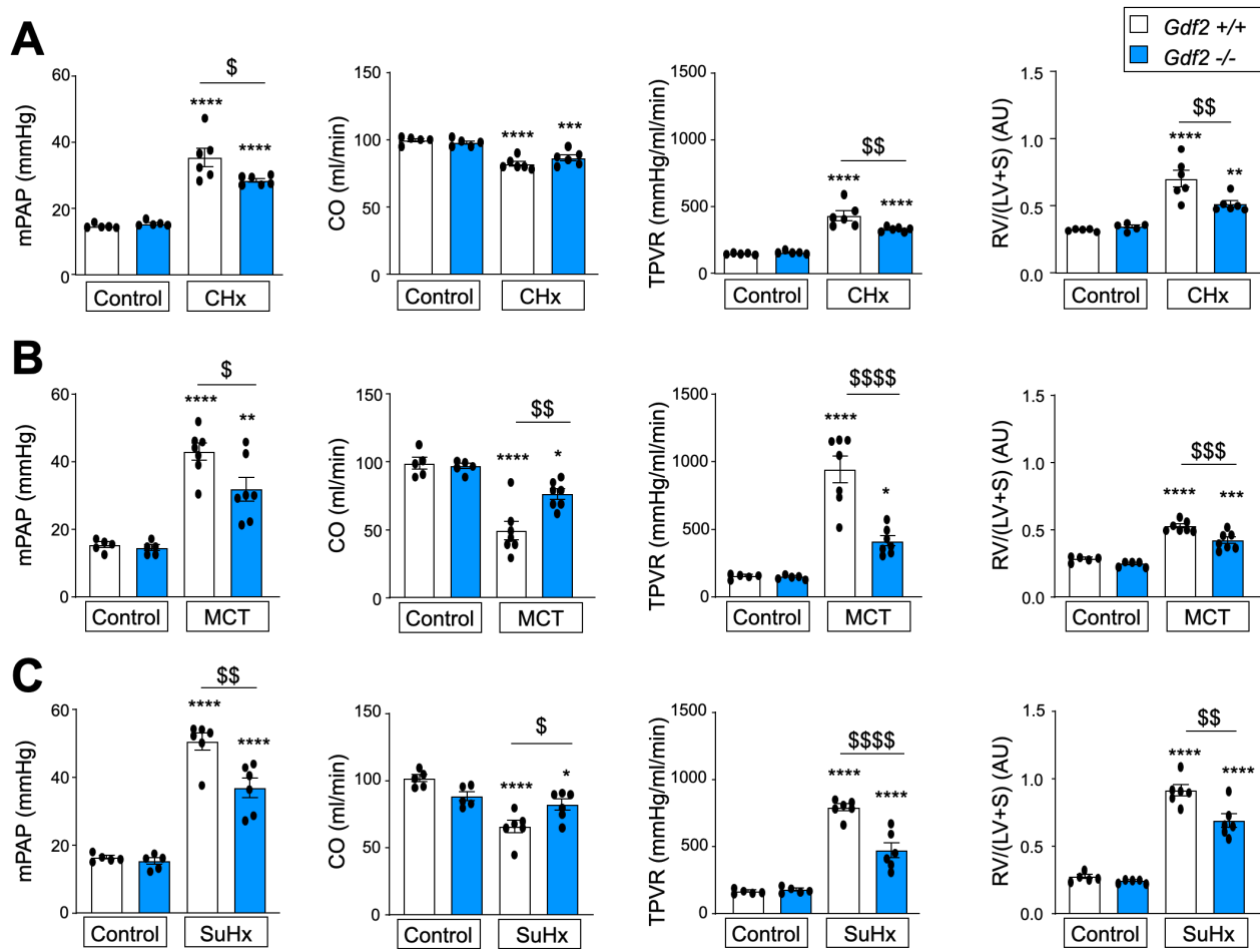

**Figure 6:** *Gdf2*<sup>-/-</sup> rats show less severe pulmonary hemodynamic profile as compared to *Gdf2*<sup>+/+</sup> in experimental models of pulmonary hypertension (PH). Mean pulmonary arterial pressures (mPAP), total pulmonary vascular resistance (TPVR), cardiac output (CO), and right ventricular hypertrophy (evaluated by the Fulton index) (A) in the chronic hypoxia, (B) the monocrotaline (MCT), and (C) the Sugen+hypoxia (SuHx) rat models of severe PH. Significance was measured using 1-way ANOVA with Tukey post hoc tests. \*, p<0.05; \*\*, p<0.01; \*\*\*, p<0.001; \*\*\*\*, p<0.0001 versus control *Gdf2*<sup>+/+</sup> rats \$, p<0.05; \$\$, p<0.01; \$\$\$, p<0.001; \$\$\$\$, p<0.0001 versus *Gdf2*<sup>+/+</sup> CHx, MCT, or SuHx rats.

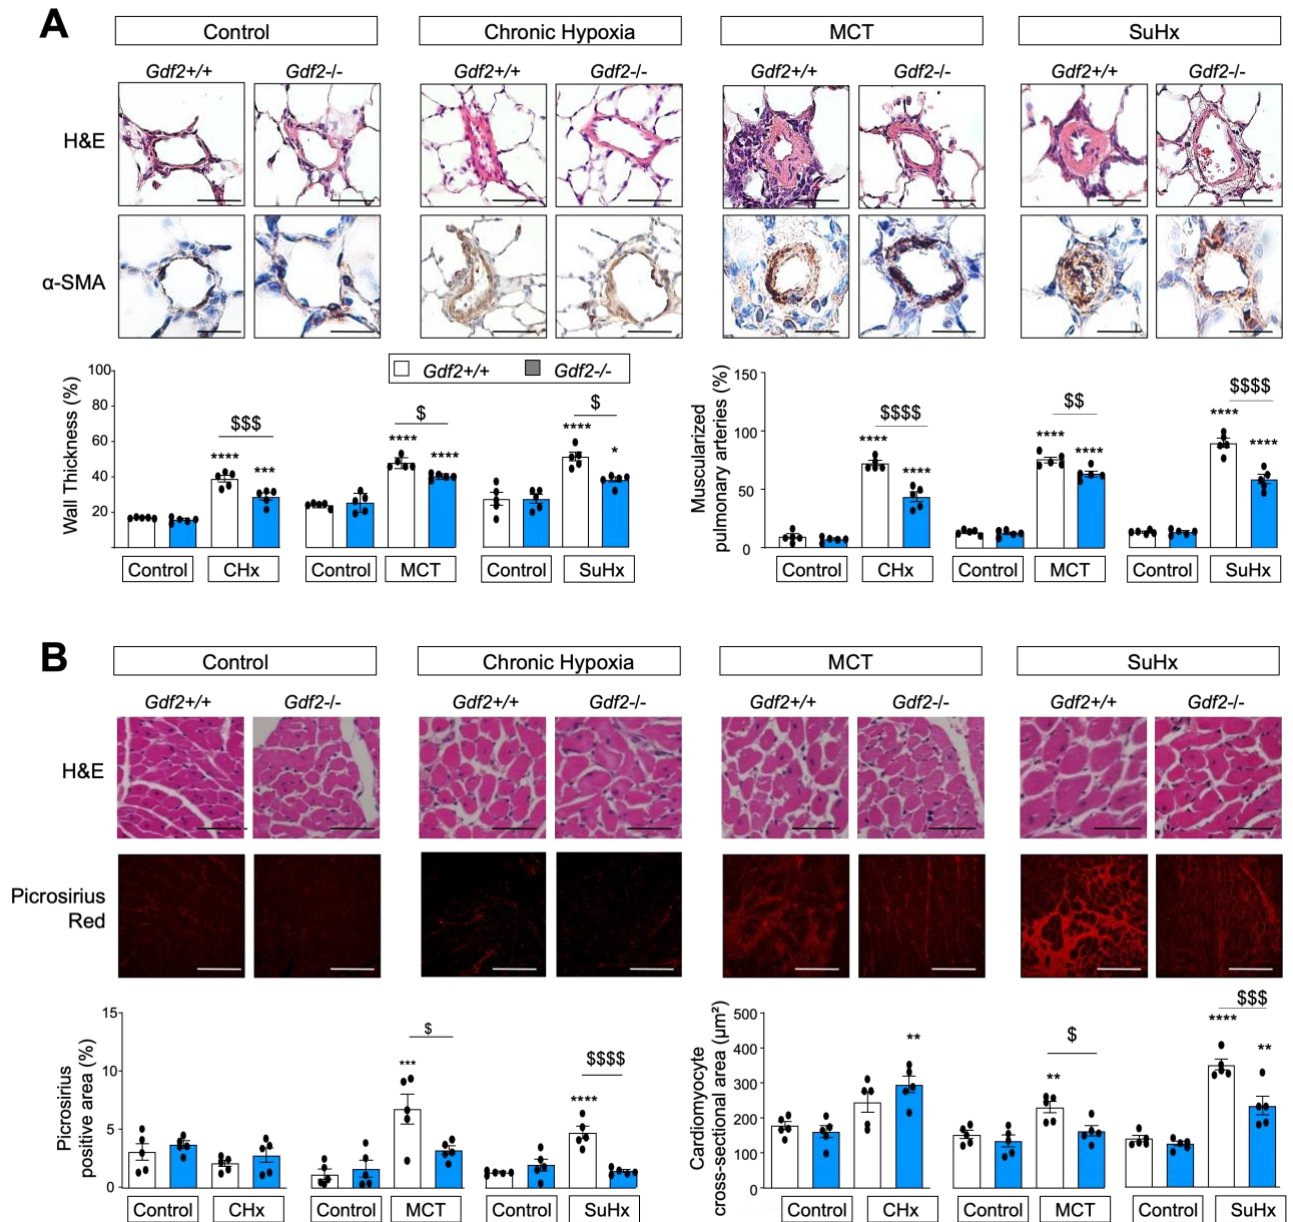

**Figure 7: *Gdf2*<sup>-/-</sup> rats exhibit less pronounced cardiac and pulmonary vascular remodeling as compared to *Gdf2*<sup>+/+</sup> experimental models of pulmonary hypertension (PH).** (A) Representation of hematoxylin and eosin (H&E), alpha-smooth muscle actin ( $\alpha$ -SMA) staining, and quantification of the percentage of wall thickness and of muscularized pulmonary arteries in lungs from *Gdf2*<sup>-/-</sup> and *Gdf2*<sup>+/+</sup> rats. (B) Representative images of H&E and picrosirius staining of tissue sections of right ventricle myocardium from either control, chronic hypoxia-, monocrotaline (MCT)- Sugen+hypoxia (SuHx)- *Gdf2*<sup>-/-</sup> and *Gdf2*<sup>+/+</sup> rats. Lower panels show quantification of cardiomyocyte cross-sectional area and picrosirius positive area. Data are represented as mean $\pm$  SEM. Scale bar = 50 $\mu\text{m}$  in all sections. Significance was measured using 1-way ANOVA with Tukey post hoc tests. \*, p<0.05; \*\*, p<0.01; \*\*\*, p<0.001; \*\*\*\*, p<0.0001 versus *Gdf2*<sup>+/+</sup> control rats. \$, p<0.05; \$\$, p<0.01; \$\$\$, p<0.001; \*\*\*\*, p<0.0001 versus *Gdf2*<sup>+/+</sup> CHx, MCT, or SuHx rats.
